# Supplementary material for: Health and Economic Impacts Assessment of O3 Exposure in Mexico
Source: MDPI journal article supplement (doi:10.3390/ijerph182111646), 2021-11-05
Supplement: s1 [file s1]

Supplementary table 1: Productivity lost (Yd)

| City ID | City name | Age | Avoidable deaths from respiratory causes mean estimate | Lower value, lost productivity | Center value, lost productivity | Upper value, lost productivity | Lost productivity by age, lower value | Lost productivity by age, center value | Lost productivity by age, upper value |
|---------|-----------|-----|--------------------------------------------------------|--------------------------------|---------------------------------|--------------------------------|---------------------------------------|----------------------------------------|---------------------------------------|
| C11.05  | Irapuato  | 30  | 0.051591601                                            | 166740.843                     | 197306.8728                     | 227872.9029                    | 8602.427017                           | 10179.37743                            | 11756.32785                           |
| C11.05  | Irapuato  | 34  | 0.051591601                                            | 158521.0723                    | 189021.9788                     | 219522.8855                    | 8178.355889                           | 9751.946481                            | 11325.53708                           |
| C11.05  | Irapuato  | 35  | 0.051591601                                            | 156268.2787                    | 186819.1459                     | 217370.0133                    | 8062.130657                           | 9638.298804                            | 11214.46696                           |
| C11.05  | Irapuato  | 38  | 0.051591601                                            | 148903.4821                    | 178803.7249                     | 208703.9665                    | 7682.169014                           | 9224.770402                            | 10767.37173                           |
| C11.05  | Irapuato  | 41  | 0.103183202                                            | 146790.962                     | 177456.6962                     | 208122.4293                    | 15146.36143                           | 18310.55008                            | 21474.7386                            |
| C11.05  | Irapuato  | 45  | 0.051591601                                            | 133082.4714                    | 164133.0148                     | 195183.553                     | 6865.937742                           | 8467.884984                            | 10069.83196                           |
| C11.05  | Irapuato  | 46  | 0.051591601                                            | 129712.9729                    | 160532.8027                     | 191352.6271                    | 6692.099923                           | 8282.144278                            | 9872.188355                           |
| C11.05  | Irapuato  | 47  | 0.051591601                                            | 125681.0568                    | 156398.7016                     | 187116.3408                    | 6484.086913                           | 8068.859383                            | 9653.631565                           |
| C11.05  | Irapuato  | 49  | 0.051591601                                            | 116206.9652                    | 145792.3524                     | 175377.7337                    | 5995.303364                           | 7521.66085                             | 9048.018033                           |
| C11.05  | Irapuato  | 50  | 0.051591601                                            | 112418.9636                    | 141702.8317                     | 170986.6949                    | 5799.874299                           | 7310.675929                            | 8821.47731                            |
| C11.05  | Irapuato  | 55  | 0.051591601                                            | 91254.2585                     | 118180.5382                     | 145106.8163                    | 4707.953279                           | 6097.123154                            | 7486.292944                           |
| C11.05  | Irapuato  | 56  | 0.051591601                                            | 86824.15133                    | 113412.3778                     | 140000.6025                    | 4479.396959                           | 5851.126124                            | 7222.855201                           |
| C11.05  | Irapuato  | 57  | 0.051591601                                            | 83063.00922                    | 108462.4999                     | 133861.9887                    | 4285.353616                           | 5595.753998                            | 6906.15429                            |
| C11.05  | Irapuato  | 58  | 0.051591601                                            | 79245.16612                    | 103589.0483                     | 127932.93                      | 4088.384979                           | 5344.324833                            | 6600.264657                           |
| C11.05  | Irapuato  | 59  | 0.154774803                                            | 76941.14504                    | 99740.70665                     | 122540.2677                    | 11908.55053                           | 15437.34818                            | 18966.14573                           |
| C11.05  | Irapuato  | 60  | 0.154774803                                            | 72907.6969                     | 94999.35059                     | 117091.0037                    | 11284.27439                           | 14703.50573                            | 18122.73697                           |
| C11.05  | Irapuato  | 61  | 0.103183202                                            | 69426.44885                    | 91094.80113                     | 112763.154                     | 7163.643274                           | 9399.453237                            | 11635.26326                           |
| C11.05  | Irapuato  | 62  | 0.206366403                                            | 63975.65532                    | 84019.84164                     | 104064.0298                    | 13202.42589                           | 17338.87253                            | 21475.31956                           |
| C11.05  | Irapuato  | 63  | 0.051591601                                            | 59911.99009                    | 79483.69333                     | 99055.39973                    | 3090.955478                           | 4100.690979                            | 5110.426644                           |
| C11.05  | Irapuato  | 64  | 0.103183202                                            | 54329.94749                    | 72490.40446                     | 90650.86469                    | 5605.937929                           | 7479.792023                            | 9353.646454                           |

| City ID | City name | Age | Avoidable deaths from respiratory causes mean estimate | Lower value, lost productivity | Center value, lost productivity | Upper value, lost productivity | Lost productivity by age, lower value | Lost productivity by age, center value | Lost productivity by age, upper value |
|---------|-----------|-----|--------------------------------------------------------|--------------------------------|---------------------------------|--------------------------------|---------------------------------------|----------------------------------------|---------------------------------------|
| C11.05  | Irapuato  | 65  | 0.206366403                                            | 46289.20553                    | 63653.93676                     | 81018.67012                    | 9552.53686                            | 13136.03399                            | 16719.53156                           |
| C11.05  | Irapuato  | 66  | 0.051591601                                            | 42821.37114                    | 59151.89997                     | 75482.42974                    | 2209.223087                           | 3051.741212                            | 3894.259386                           |
| C11.05  | Irapuato  | 67  | 0.103183202                                            | 39390.0291                     | 54293.20647                     | 69196.38482                    | 4064.389317                           | 5602.146874                            | 7139.904531                           |
| C11.05  | Irapuato  | 68  | 0.154774803                                            | 36107.86789                    | 50272.92621                     | 64437.98553                    | 5588.588122                           | 7780.982226                            | 9973.376486                           |
| C11.05  | Irapuato  | 69  | 0.206366403                                            | 31608.07411                    | 44293.77412                     | 56979.47517                    | 6522.844571                           | 9140.746856                            | 11758.64936                           |
| C11.05  | Irapuato  | 70  | 0.206366403                                            | 28099.66509                    | 38902.32928                     | 49704.99455                    | 5798.82682                            | 8028.133776                            | 10257.44095                           |
| C11.05  | Irapuato  | 71  | 0.412732807                                            | 24587.75093                    | 34481.15354                     | 44374.55725                    | 10148.17145                           | 14231.50328                            | 18314.83556                           |
| C11.05  | Irapuato  | 72  | 0.103183202                                            | 21863.4504                     | 28976.4732                      | 36089.4959                     | 2255.940812                           | 2989.885278                            | 3723.829734                           |
| C11.05  | Irapuato  | 73  | 0.051591601                                            | 17782.90208                    | 24246.95164                     | 30711.00234                    | 917.4483859                           | 1250.939051                            | 1584.429774                           |
| C11.05  | Irapuato  | 74  | 0.206366403                                            | 13811.94966                    | 18884.42031                     | 23956.89213                    | 2850.322375                           | 3897.109899                            | 4943.897664                           |
| C11.05  | Irapuato  | 75  | 0.257958004                                            | 7935.115184                    | 11930.12034                     | 15925.12669                    | 2046.926476                           | 3077.470033                            | 4108.013899                           |
| C11.05  | Irapuato  | 76  | 0.361141206                                            | 3654.873946                    | 6821.56493                      | 9988.255913                    | 1319.925584                           | 2463.548185                            | 3607.170785                           |
| C11.05  | Irapuato  | 77  | 0.257958004                                            | 3654.873946                    | 6821.56493                      | 9988.255913                    | 942.8039888                           | 1759.677275                            | 2576.550561                           |
| C11.05  | Irapuato  | 78  | 0.309549605                                            | 3654.873946                    | 6821.56493                      | 9988.255913                    | 1131.364787                           | 2111.61273                             | 3091.860673                           |
| C11.05  | Irapuato  | 79  | 0.412732807                                            | 3654.873946                    | 6821.56493                      | 9988.255913                    | 1508.486382                           | 2815.48364                             | 4122.480897                           |
| C11.05  | Irapuato  | 80  | 0.361141206                                            | 3654.873946                    | 6821.56493                      | 9988.255913                    | 1319.925584                           | 2463.548185                            | 3607.170785                           |
| C11.05  | Irapuato  | 81  | 0.257958004                                            | 3654.873946                    | 6821.56493                      | 9988.255913                    | 942.8039888                           | 1759.677275                            | 2576.550561                           |
| C11.05  | Irapuato  | 82  | 0.515916008                                            | 3654.873946                    | 6821.56493                      | 9988.255913                    | 1885.607978                           | 3519.35455                             | 5153.101122                           |
| C11.05  | Irapuato  | 83  | 0.206366403                                            | 3654.873946                    | 6821.56493                      | 9988.255913                    | 754.243191                            | 1407.74182                             | 2061.240449                           |
| C11.05  | Irapuato  | 84  | 0.61909921                                             | 3654.873946                    | 6821.56493                      | 9988.255913                    | 2262.729573                           | 4223.225459                            | 6183.721346                           |
| C11.05  | Irapuato  | 85  | 0.773874013                                            | 3654.873946                    | 6821.56493                      | 9988.255913                    | 2828.411966                           | 5279.031824                            | 7729.651682                           |
| C11.05  | Irapuato  | 86  | 0.361141206                                            | 3654.873946                    | 6821.56493                      | 9988.255913                    | 1319.925584                           | 2463.548185                            | 3607.170785                           |

| City ID | City name | Age | Avoidable deaths from respiratory causes mean estimate | Lower value, lost productivity | Center value, lost productivity | Upper value, lost productivity | Lost productivity by age, lower value | Lost productivity by age, center value | Lost productivity by age, upper value |
|---------|-----------|-----|--------------------------------------------------------|--------------------------------|---------------------------------|--------------------------------|---------------------------------------|----------------------------------------|---------------------------------------|
| C11.05  | Irapuato  | 87  | 0.464324408                                            | 3654.873946                    | 6821.56493                      | 9988.255913                    | 1697.04718                            | 3167.419095                            | 4637.791009                           |
| C11.05  | Irapuato  | 88  | 0.309549605                                            | 3654.873946                    | 6821.56493                      | 9988.255913                    | 1131.364787                           | 2111.61273                             | 3091.860673                           |
| C11.05  | Irapuato  | 89  | 0.206366403                                            | 3654.873946                    | 6821.56493                      | 9988.255913                    | 754.243191                            | 1407.74182                             | 2061.240449                           |
| C11.05  | Irapuato  | 90  | 0.257958004                                            | 3654.873946                    | 6821.56493                      | 9988.255913                    | 942.8039888                           | 1759.677275                            | 2576.550561                           |
| C11.05  | Irapuato  | 91  | 0.257958004                                            | 3654.873946                    | 6821.56493                      | 9988.255913                    | 942.8039888                           | 1759.677275                            | 2576.550561                           |
| C11.05  | Irapuato  | 92  | 0.361141206                                            | 3654.873946                    | 6821.56493                      | 9988.255913                    | 1319.925584                           | 2463.548185                            | 3607.170785                           |
| C11.05  | Irapuato  | 93  | 0.361141206                                            | 3654.873946                    | 6821.56493                      | 9988.255913                    | 1319.925584                           | 2463.548185                            | 3607.170785                           |
| C11.05  | Irapuato  | 94  | 0.154774803                                            | 3654.873946                    | 6821.56493                      | 9988.255913                    | 565.6823933                           | 1055.806365                            | 1545.930336                           |
| C11.05  | Irapuato  | 95  | 0.154774803                                            | 3654.873946                    | 6821.56493                      | 9988.255913                    | 565.6823933                           | 1055.806365                            | 1545.930336                           |
| C11.05  | Irapuato  | 97  | 0.103183202                                            | 3654.873946                    | 6821.56493                      | 9988.255913                    | 377.1215955                           | 703.8709099                            | 1030.620224                           |
| C11.05  | Irapuato  | 98  | 0.103183202                                            | 3654.873946                    | 6821.56493                      | 9988.255913                    | 377.1215955                           | 703.8709099                            | 1030.620224                           |
| C11.05  | Irapuato  | 100 | 0.206366403                                            | 3654.873946                    | 6821.56493                      | 9988.255913                    | 754.243191                            | 1407.74182                             | 2061.240449                           |
| C11.05  | Irapuato  | 101 | 0.051591601                                            | 3654.873946                    | 6821.56493                      | 9988.255913                    | 188.5607978                           | 351.935455                             | 515.3101122                           |
| C11.05  | Irapuato  | 102 | 0.051591601                                            | 3654.873946                    | 6821.56493                      | 9988.255913                    | 188.5607978                           | 351.935455                             | 515.3101122                           |
| C11.05  | Irapuato  | 104 | 0.051591601                                            | 3654.873946                    | 6821.56493                      | 9988.255913                    | 188.5607978                           | 351.935455                             | 515.3101122                           |
| C11.06  | Salamanca | 30  | 0.043514162                                            | 173556.3867                    | 213150.4168                     | 257080.3119                    | 7552.160771                           | 9275.061821                            | 11186.6344                            |
| C11.06  | Salamanca | 31  | 0.043514162                                            | 172444.5127                    | 211573.0974                     | 255167.6219                    | 7503.778505                           | 9206.426089                            | 11103.4053                            |
| C11.06  | Salamanca | 41  | 0.043514162                                            | 151036.141                     | 188842.593                      | 232650.8959                    | 6572.211146                           | 8217.327233                            | 10123.60883                           |
| C11.06  | Salamanca | 45  | 0.043514162                                            | 136165.1594                    | 174871.8634                     | 220333.7048                    | 5925.112839                           | 7609.402639                            | 9587.636582                           |
| C11.06  | Salamanca | 46  | 0.043514162                                            | 133802.6104                    | 171944.7413                     | 216885.3646                    | 5822.308498                           | 7482.031371                            | 9437.584947                           |
| C11.06  | Salamanca | 48  | 0.043514162                                            | 126512.1799                    | 161902.4834                     | 204505.3087                    | 5505.071525                           | 7045.050931                            | 8898.877184                           |
| C11.06  | Salamanca | 49  | 0.043514162                                            | 124199.3619                    | 152973.2626                     | 195979.9164                    | 5404.431186                           | 6656.503368                            | 8527.901879                           |

| City ID | City name | Age | Avoidable deaths from respiratory causes mean estimate | Lower value, lost productivity | Center value, lost productivity | Upper value, lost productivity | Lost productivity by age, lower value | Lost productivity by age, center value | Lost productivity by age, upper value |
|---------|-----------|-----|--------------------------------------------------------|--------------------------------|---------------------------------|--------------------------------|---------------------------------------|----------------------------------------|---------------------------------------|
| C11.06  | Salamanca | 52  | 0.043514162                                            | 116644.9217                    | 145932.806                      | 177409.3755                    | 5075.70605                            | 6350.1438                              | 7719.820351                           |
| C11.06  | Salamanca | 54  | 0.043514162                                            | 108132.5508                    | 134926.1242                     | 164041.6725                    | 4705.297358                           | 5871.197262                            | 7138.135953                           |
| C11.06  | Salamanca | 56  | 0.043514162                                            | 98178.61828                    | 125211.219                      | 154707.2041                    | 4272.160326                           | 5448.461302                            | 6731.954381                           |
| C11.06  | Salamanca | 60  | 0.043514162                                            | 79059.70015                    | 102335.6919                     | 128384.2444                    | 3440.21662                            | 4453.051902                            | 5586.53284                            |
| C11.06  | Salamanca | 62  | 0.043514162                                            | 70203.73922                    | 92014.35148                     | 116766.3734                    | 3054.856899                           | 4003.92742                             | 5080.990917                           |
| C11.06  | Salamanca | 65  | 0.087028325                                            | 58159.07016                    | 75079.77522                     | 95214.63799                    | 5061.486431                           | 6534.067042                            | 8286.370413                           |
| C11.06  | Salamanca | 66  | 0.087028325                                            | 57129.10772                    | 74015.21918                     | 94211.91184                    | 4971.850526                           | 6441.420513                            | 8199.104836                           |
| C11.06  | Salamanca | 67  | 0.043514162                                            | 57504.33018                    | 70451.25432                     | 86808.0771                     | 2502.252754                           | 3065.627312                            | 3777.380752                           |
| C11.06  | Salamanca | 68  | 0.130542487                                            | 50712.83202                    | 62724.20196                     | 78247.76627                    | 6620.179203                           | 8188.173304                            | 10214.65799                           |
| C11.06  | Salamanca | 69  | 0.043514162                                            | 43717.58891                    | 58709.53316                     | 69430.6461                     | 1902.334257                           | 2554.696152                            | 3021.2164                             |
| C11.06  | Salamanca | 70  | 0.043514162                                            | 39255.15025                    | 52425.46375                     | 61196.81975                    | 1708.154977                           | 2281.250136                            | 2662.928344                           |
| C11.06  | Salamanca | 71  | 0.174056649                                            | 34658.83844                    | 45952.87225                     | 52715.9786                     | 6032.601277                           | 7998.402956                            | 9175.566585                           |
| C11.06  | Salamanca | 73  | 0.087028325                                            | 21643.00052                    | 29505.35193                     | 32560.84241                    | 1883.554072                           | 2567.801343                            | 2833.715559                           |
| C11.06  | Salamanca | 74  | 0.130542487                                            | 15797.77646                    | 22906.07551                     | 25063.30655                    | 2062.281025                           | 2990.216059                            | 3271.826363                           |
| C11.06  | Salamanca | 75  | 0.043514162                                            | 9777.195688                    | 13559.02133                     | 17340.84461                    | 425.4464795                           | 590.0094543                            | 754.572326                            |
| C11.06  | Salamanca | 76  | 0.130542487                                            | 4854.288663                    | 5698.92508                      | 6543.560296                    | 633.6909136                           | 743.9518518                            | 854.2126333                           |
| C11.06  | Salamanca | 77  | 0.130542487                                            | 4854.288663                    | 5698.92508                      | 6543.560296                    | 633.6909136                           | 743.9518518                            | 854.2126333                           |
| C11.06  | Salamanca | 78  | 0.043514162                                            | 4854.288663                    | 5698.92508                      | 6543.560296                    | 211.2303045                           | 247.9839506                            | 284.7375444                           |
| C11.06  | Salamanca | 79  | 0.043514162                                            | 4854.288663                    | 5698.92508                      | 6543.560296                    | 211.2303045                           | 247.9839506                            | 284.7375444                           |
| C11.06  | Salamanca | 80  | 0.174056649                                            | 4854.288663                    | 5698.92508                      | 6543.560296                    | 844.9212181                           | 991.9358024                            | 1138.950178                           |
| C11.06  | Salamanca | 81  | 0.304599136                                            | 4854.288663                    | 5698.92508                      | 6543.560296                    | 1478.612132                           | 1735.887654                            | 1993.162811                           |
| C11.06  | Salamanca | 82  | 0.174056649                                            | 4854.288663                    | 5698.92508                      | 6543.560296                    | 844.9212181                           | 991.9358024                            | 1138.950178                           |

| City ID | City name | Age | Avoidable deaths from respiratory causes mean estimate | Lower value, lost productivity | Center value, lost productivity | Upper value, lost productivity | Lost productivity by age, lower value | Lost productivity by age, center value | Lost productivity by age, upper value |
|---------|-----------|-----|--------------------------------------------------------|--------------------------------|---------------------------------|--------------------------------|---------------------------------------|----------------------------------------|---------------------------------------|
| C11.06  | Salamanca | 83  | 0.174056649                                            | 4854.288663                    | 5698.92508                      | 6543.560296                    | 844.9212181                           | 991.9358024                            | 1138.950178                           |
| C11.06  | Salamanca | 84  | 0.174056649                                            | 4854.288663                    | 5698.92508                      | 6543.560296                    | 844.9212181                           | 991.9358024                            | 1138.950178                           |
| C11.06  | Salamanca | 85  | 0.217570811                                            | 4854.288663                    | 5698.92508                      | 6543.560296                    | 1056.151523                           | 1239.919753                            | 1423.687722                           |
| C11.06  | Salamanca | 86  | 0.261084974                                            | 4854.288663                    | 5698.92508                      | 6543.560296                    | 1267.381827                           | 1487.903704                            | 1708.425267                           |
| C11.06  | Salamanca | 87  | 0.087028325                                            | 4854.288663                    | 5698.92508                      | 6543.560296                    | 422.460609                            | 495.9679012                            | 569.4750888                           |
| C11.06  | Salamanca | 88  | 0.087028325                                            | 4854.288663                    | 5698.92508                      | 6543.560296                    | 422.460609                            | 495.9679012                            | 569.4750888                           |
| C11.06  | Salamanca | 89  | 0.261084974                                            | 4854.288663                    | 5698.92508                      | 6543.560296                    | 1267.381827                           | 1487.903704                            | 1708.425267                           |
| C11.06  | Salamanca | 90  | 0.174056649                                            | 4854.288663                    | 5698.92508                      | 6543.560296                    | 844.9212181                           | 991.9358024                            | 1138.950178                           |
| C11.06  | Salamanca | 91  | 0.130542487                                            | 4854.288663                    | 5698.92508                      | 6543.560296                    | 633.6909136                           | 743.9518518                            | 854.2126333                           |
| C11.06  | Salamanca | 92  | 0.043514162                                            | 4854.288663                    | 5698.92508                      | 6543.560296                    | 211.2303045                           | 247.9839506                            | 284.7375444                           |
| C11.06  | Salamanca | 93  | 0.130542487                                            | 4854.288663                    | 5698.92508                      | 6543.560296                    | 633.6909136                           | 743.9518518                            | 854.2126333                           |
| C11.06  | Salamanca | 94  | 0.043514162                                            | 4854.288663                    | 5698.92508                      | 6543.560296                    | 211.2303045                           | 247.9839506                            | 284.7375444                           |
| C11.06  | Salamanca | 95  | 0.043514162                                            | 4854.288663                    | 5698.92508                      | 6543.560296                    | 211.2303045                           | 247.9839506                            | 284.7375444                           |
| C11.06  | Salamanca | 96  | 0.130542487                                            | 4854.288663                    | 5698.92508                      | 6543.560296                    | 633.6909136                           | 743.9518518                            | 854.2126333                           |
| C11.06  | Salamanca | 100 | 0.087028325                                            | 4854.288663                    | 5698.92508                      | 6543.560296                    | 422.460609                            | 495.9679012                            | 569.4750888                           |
| C11.06  | Salamanca | 103 | 0.043514162                                            | 4854.288663                    | 5698.92508                      | 6543.560296                    | 211.2303045                           | 247.9839506                            | 284.7375444                           |
| C11.06  | Salamanca | 109 | 0.043514162                                            | 4854.288663                    | 5698.92508                      | 6543.560296                    | 211.2303045                           | 247.9839506                            | 284.7375444                           |
| M05.01  | La Laguna | 34  | 0.008047451                                            | 192327.0263                    | 207316.0866                     | 222305.1429                    | 1547.742333                           | 1668.366063                            | 1788.98976                            |
| M05.01  | La Laguna | 35  | 0.004023726                                            | 190527.4149                    | 205442.986                      | 220358.5529                    | 766.6300244                           | 826.6461886                            | 886.6623362                           |
| M05.01  | La Laguna | 37  | 0.008047451                                            | 186027.7307                    | 200896.3928                     | 215765.0531                    | 1497.04906                            | 1616.703891                            | 1736.358707                           |
| M05.01  | La Laguna | 38  | 0.008047451                                            | 183437.49                      | 198327.1024                     | 213216.714                     | 1476.204225                           | 1596.027652                            | 1715.851073                           |
| M05.01  | La Laguna | 39  | 0.004023726                                            | 180388.9343                    | 195270.4262                     | 210151.9185                    | 725.8355612                           | 785.7145999                            | 845.5936406                           |

| City ID | City name | Age | Avoidable deaths from respiratory causes mean estimate | Lower value, lost productivity | Center value, lost productivity | Upper value, lost productivity | Lost productivity by age, lower value | Lost productivity by age, center value | Lost productivity by age, upper value |
|---------|-----------|-----|--------------------------------------------------------|--------------------------------|---------------------------------|--------------------------------|---------------------------------------|----------------------------------------|---------------------------------------|
| M05.01  | La Laguna | 41  | 0.008047451                                            | 182118.014                     | 197218.8862                     | 212319.759                     | 1465.585806                           | 1587.109336                            | 1708.632871                           |
| M05.01  | La Laguna | 42  | 0.004023726                                            | 179263.1491                    | 194372.7395                     | 209482.3304                    | 721.3057105                           | 782.1025549                            | 842.8994017                           |
| M05.01  | La Laguna | 43  | 0.008047451                                            | 176227.8905                    | 191310.7737                     | 206393.6573                    | 1418.185326                           | 1539.56409                             | 1660.942858                           |
| M05.01  | La Laguna | 44  | 0.012071177                                            | 173684.9835                    | 188752.4855                     | 203819.9882                    | 2096.58211                            | 2278.464587                            | 2460.347072                           |
| M05.01  | La Laguna | 45  | 0.004023726                                            | 170540.3624                    | 185578.2359                     | 200616.1112                    | 686.2076107                           | 746.7158864                            | 807.2241695                           |
| M05.01  | La Laguna | 46  | 0.008047451                                            | 167278.4676                    | 182287.1682                     | 197295.8708                    | 1346.165283                           | 1466.947067                            | 1587.728866                           |
| M05.01  | La Laguna | 47  | 0.016094902                                            | 163337.7198                    | 178291.6192                     | 193245.5194                    | 2628.904615                           | 2869.586163                            | 3110.267723                           |
| M05.01  | La Laguna | 49  | 0.008047451                                            | 155402.9338                    | 170084.972                      | 184767.0121                    | 1250.597506                           | 1368.750489                            | 1486.903489                           |
| M05.01  | La Laguna | 50  | 0.004023726                                            | 151649.8626                    | 166171.7776                     | 180693.6947                    | 610.1974245                           | 668.6296248                            | 727.0618333                           |
| M05.01  | La Laguna | 51  | 0.012071177                                            | 146594.3244                    | 161023.5299                     | 175452.7376                    | 1769.565979                           | 1943.743467                            | 2117.920981                           |
| M05.01  | La Laguna | 52  | 0.004023726                                            | 141978.2338                    | 156188.4637                     | 170398.6946                    | 571.2814447                           | 628.4595096                            | 685.6375783                           |
| M05.01  | La Laguna | 53  | 0.012071177                                            | 137255.3103                    | 151358.4263                     | 165461.5433                    | 1656.83309                            | 1827.074294                            | 1997.315511                           |
| M05.01  | La Laguna | 55  | 0.024142353                                            | 126810.7261                    | 140574.2054                     | 154337.6846                    | 3061.50934                            | 3393.792119                            | 3726.074894                           |
| M05.01  | La Laguna | 56  | 0.016094902                                            | 122659.8639                    | 136245.834                      | 149831.8039                    | 1974.198506                           | 2192.863365                            | 2411.52822                            |
| M05.01  | La Laguna | 57  | 0.020118628                                            | 117619.7329                    | 131012.1883                     | 144404.6434                    | 2366.347614                           | 2635.785436                            | 2905.223254                           |
| M05.01  | La Laguna | 58  | 0.03621353                                             | 112652.6157                    | 125821.7856                     | 138990.9553                    | 4079.548858                           | 4556.450985                            | 5033.353104                           |
| M05.01  | La Laguna | 59  | 0.032189804                                            | 107676.9295                    | 120603.9423                     | 133530.9562                    | 3466.099286                           | 3882.217299                            | 4298.335344                           |
| M05.01  | La Laguna | 60  | 0.012071177                                            | 103236.8076                    | 115804.1778                     | 128371.5479                    | 1246.189736                           | 1397.892682                            | 1549.595625                           |
| M05.01  | La Laguna | 61  | 0.028166079                                            | 97528.16596                    | 109707.3407                     | 121886.5152                    | 2746.986002                           | 3090.025595                            | 3433.065183                           |
| M05.01  | La Laguna | 62  | 0.028166079                                            | 91499.93441                    | 103209.1184                     | 114918.3022                    | 2577.194357                           | 2906.996156                            | 3236.797949                           |
| M05.01  | La Laguna | 63  | 0.024142353                                            | 85725.92467                    | 96952.06342                     | 108178.202                     | 2069.625552                           | 2340.650959                            | 2611.676361                           |
| M05.01  | La Laguna | 64  | 0.024142353                                            | 80610.41556                    | 91335.83774                     | 102061.2597                    | 1946.125125                           | 2205.062055                            | 2463.998981                           |

| City ID | City name | Age | Avoidable deaths from respiratory causes mean estimate | Lower value, lost productivity | Center value, lost productivity | Upper value, lost productivity | Lost productivity by age, lower value | Lost productivity by age, center value | Lost productivity by age, upper value |
|---------|-----------|-----|--------------------------------------------------------|--------------------------------|---------------------------------|--------------------------------|---------------------------------------|----------------------------------------|---------------------------------------|
| M05.01  | La Laguna | 65  | 0.032189804                                            | 74751.70411                    | 84810.40944                     | 94869.1158                     | 2406.242725                           | 2730.030481                            | 3053.818269                           |
| M05.01  | La Laguna | 66  | 0.024142353                                            | 67869.5983                     | 77357.11589                     | 86844.63577                    | 1638.531814                           | 1867.582815                            | 2096.633871                           |
| M05.01  | La Laguna | 67  | 0.016094902                                            | 61750.41059                    | 70671.16561                     | 79591.92174                    | 993.8668154                           | 1137.445494                            | 1281.024191                           |
| M05.01  | La Laguna | 68  | 0.048284706                                            | 55117.92114                    | 63500.52827                     | 71883.13655                    | 2661.35264                            | 3066.104365                            | 3470.856145                           |
| M05.01  | La Laguna | 69  | 0.032189804                                            | 49913.38946                    | 57393.90033                     | 64874.41363                    | 1606.702237                           | 1847.498418                            | 2088.294677                           |
| M05.01  | La Laguna | 70  | 0.028166079                                            | 44086.31                       | 50968.92896                     | 57851.54917                    | 1241.738479                           | 1435.594866                            | 1629.451289                           |
| M05.01  | La Laguna | 71  | 0.020118628                                            | 37632.00627                    | 43972.27419                     | 50312.54218                    | 757.1043226                           | 884.6618124                            | 1012.219303                           |
| M05.01  | La Laguna | 72  | 0.044260981                                            | 30378.63203                    | 35607.89796                     | 40837.16395                    | 1344.588052                           | 1576.040491                            | 1807.492933                           |
| M05.01  | La Laguna | 73  | 0.032189804                                            | 25060.45756                    | 29469.38473                     | 33878.31196                    | 806.6912238                           | 948.6137265                            | 1090.536231                           |
| M05.01  | La Laguna | 74  | 0.056332157                                            | 19957.38146                    | 23303.14691                     | 26648.91244                    | 1124.242355                           | 1312.716542                            | 1501.190732                           |
| M05.01  | La Laguna | 75  | 0.020118628                                            | 14187.90108                    | 16296.38562                     | 18404.869                      | 285.4410992                           | 327.8609147                            | 370.2807067                           |
| M05.01  | La Laguna | 76  | 0.076450785                                            | 7582.502511                    | 8859.07636                      | 10135.64901                    | 579.6882704                           | 677.2833435                            | 774.8783247                           |
| M05.01  | La Laguna | 77  | 0.044260981                                            | 7582.502511                    | 8859.07636                      | 10135.64901                    | 335.6089987                           | 392.1114094                            | 448.6137669                           |
| M05.01  | La Laguna | 78  | 0.03621353                                             | 7582.502511                    | 8859.07636                      | 10135.64901                    | 274.5891807                           | 320.8184259                            | 367.0476275                           |
| M05.01  | La Laguna | 79  | 0.044260981                                            | 7582.502511                    | 8859.07636                      | 10135.64901                    | 335.6089987                           | 392.1114094                            | 448.6137669                           |
| M05.01  | La Laguna | 80  | 0.056332157                                            | 7582.502511                    | 8859.07636                      | 10135.64901                    | 427.1387256                           | 499.0508847                            | 570.9629761                           |
| M05.01  | La Laguna | 81  | 0.084498236                                            | 7582.502511                    | 8859.07636                      | 10135.64901                    | 640.7080884                           | 748.576327                             | 856.4444642                           |
| M05.01  | La Laguna | 82  | 0.056332157                                            | 7582.502511                    | 8859.07636                      | 10135.64901                    | 427.1387256                           | 499.0508847                            | 570.9629761                           |
| M05.01  | La Laguna | 83  | 0.028166079                                            | 7582.502511                    | 8859.07636                      | 10135.64901                    | 213.5693628                           | 249.5254423                            | 285.4814881                           |
| M05.01  | La Laguna | 84  | 0.060355883                                            | 7582.502511                    | 8859.07636                      | 10135.64901                    | 457.6486345                           | 534.6973764                            | 611.7460458                           |
| M05.01  | La Laguna | 85  | 0.052308432                                            | 7582.502511                    | 8859.07636                      | 10135.64901                    | 396.6288166                           | 463.4043929                            | 530.1799064                           |
| M05.01  | La Laguna | 86  | 0.03621353                                             | 7582.502511                    | 8859.07636                      | 10135.64901                    | 274.5891807                           | 320.8184259                            | 367.0476275                           |

| City ID | City name       | Age | Avoidable deaths from respiratory causes mean estimate | Lower value, lost productivity | Center value, lost productivity | Upper value, lost productivity | Lost productivity by age, lower value | Lost productivity by age, center value | Lost productivity by age, upper value |
|---------|-----------------|-----|--------------------------------------------------------|--------------------------------|---------------------------------|--------------------------------|---------------------------------------|----------------------------------------|---------------------------------------|
| M05.01  | La Laguna       | 87  | 0.068403334                                            | 7582.502511                    | 8859.07636                      | 10135.64901                    | 518.6684525                           | 605.9903599                            | 693.3121853                           |
| M05.01  | La Laguna       | 88  | 0.040237255                                            | 7582.502511                    | 8859.07636                      | 10135.64901                    | 305.0990897                           | 356.4649176                            | 407.8306972                           |
| M05.01  | La Laguna       | 89  | 0.052308432                                            | 7582.502511                    | 8859.07636                      | 10135.64901                    | 396.6288166                           | 463.4043929                            | 530.1799064                           |
| M05.01  | La Laguna       | 90  | 0.032189804                                            | 7582.502511                    | 8859.07636                      | 10135.64901                    | 244.0792718                           | 285.1719341                            | 326.2645578                           |
| M05.01  | La Laguna       | 91  | 0.060355883                                            | 7582.502511                    | 8859.07636                      | 10135.64901                    | 457.6486345                           | 534.6973764                            | 611.7460458                           |
| M05.01  | La Laguna       | 92  | 0.016094902                                            | 7582.502511                    | 8859.07636                      | 10135.64901                    | 122.0396359                           | 142.585967                             | 163.1322789                           |
| M05.01  | La Laguna       | 93  | 0.03621353                                             | 7582.502511                    | 8859.07636                      | 10135.64901                    | 274.5891807                           | 320.8184259                            | 367.0476275                           |
| M05.01  | La Laguna       | 94  | 0.024142353                                            | 7582.502511                    | 8859.07636                      | 10135.64901                    | 183.0594538                           | 213.8789506                            | 244.6984183                           |
| M05.01  | La Laguna       | 95  | 0.020118628                                            | 7582.502511                    | 8859.07636                      | 10135.64901                    | 152.5495448                           | 178.2324588                            | 203.9153486                           |
| M05.01  | La Laguna       | 96  | 0.016094902                                            | 7582.502511                    | 8859.07636                      | 10135.64901                    | 122.0396359                           | 142.585967                             | 163.1322789                           |
| M05.01  | La Laguna       | 97  | 0.016094902                                            | 7582.502511                    | 8859.07636                      | 10135.64901                    | 122.0396359                           | 142.585967                             | 163.1322789                           |
| M05.01  | La Laguna       | 98  | 0.016094902                                            | 7582.502511                    | 8859.07636                      | 10135.64901                    | 122.0396359                           | 142.585967                             | 163.1322789                           |
| M05.01  | La Laguna       | 101 | 0.004023726                                            | 7582.502511                    | 8859.07636                      | 10135.64901                    | 30.50990897                           | 35.64649176                            | 40.78306972                           |
| M05.01  | La Laguna       | 102 | 0.004023726                                            | 7582.502511                    | 8859.07636                      | 10135.64901                    | 30.50990897                           | 35.64649176                            | 40.78306972                           |
| M05.01  | La Laguna       | 106 | 0.004023726                                            | 7582.502511                    | 8859.07636                      | 10135.64901                    | 30.50990897                           | 35.64649176                            | 40.78306972                           |
| M09.01  | Valle de México | 30  | 0.949964498                                            | 229822.1346                    | 239150.5128                     | 248478.8945                    | 218322.8688                           | 227184.4969                            | 236046.1283                           |
| M09.01  | Valle de México | 31  | 0.76977445                                             | 227694.8983                    | 237085.6781                     | 246476.4616                    | 175273.7151                           | 182502.4975                            | 189731.2827                           |
| M09.01  | Valle de México | 32  | 0.789187921                                            | 225532.9578                    | 234987.101                      | 244441.2468                    | 177987.8862                           | 185448.9818                            | 192910.0795                           |
| M09.01  | Valle de México | 33  | 1.192235614                                            | 223181.7553                    | 232701.5018                     | 242221.2508                    | 266085.237                            | 277435.0178                            | 288784.8016                           |



| City ID | City name       | Age | Avoidable deaths from respiratory causes mean estimate | Lower value, lost productivity | Center value, lost productivity | Upper value, lost productivity | Lost productivity by age, lower value | Lost productivity by age, center value | Lost productivity by age, upper value |
|---------|-----------------|-----|--------------------------------------------------------|--------------------------------|---------------------------------|--------------------------------|---------------------------------------|----------------------------------------|---------------------------------------|
| M09.01  | Valle de México | 34  | 0.913067784                                            | 220892.804                     | 230458.4471                     | 240024.093                     | 201690.103                            | 210424.1836                            | 219158.2667                           |
| M09.01  | Valle de México | 35  | 1.737133229                                            | 218060.5472                    | 227658.2556                     | 237255.9656                    | 378800.2225                           | 395472.7208                            | 412145.2217                           |
| M09.01  | Valle de México | 36  | 0.987711781                                            | 215431.2395                    | 225090.7654                     | 234750.2916                    | 212783.9731                           | 222324.8007                            | 231865.6285                           |
| M09.01  | Valle de México | 37  | 1.177065208                                            | 212654.5371                    | 222355.7129                     | 232056.8902                    | 250308.2569                           | 261727.1734                            | 273146.0917                           |
| M09.01  | Valle de México | 38  | 0.993695488                                            | 209884.1177                    | 219644.3708                     | 229404.6255                    | 208560.9007                           | 218259.6201                            | 227958.3412                           |
| M09.01  | Valle de México | 39  | 1.544587718                                            | 206908.3439                    | 216599.8468                     | 226291.3502                    | 319588.0866                           | 334557.463                             | 349526.8401                           |
| M09.01  | Valle de México | 40  | 1.484626986                                            | 212704.7298                    | 222677.3246                     | 232649.9186                    | 315787.1819                           | 330592.7653                            | 345398.3476                           |
| M09.01  | Valle de México | 41  | 1.528044409                                            | 209857.7644                    | 219896.9694                     | 229936.1736                    | 320671.9837                           | 336012.3347                            | 351352.6845                           |
| M09.01  | Valle de México | 42  | 2.385416313                                            | 206802.316                     | 216929.2029                     | 227056.089                     | 493309.6182                           | 517466.4595                            | 541623.2988                           |
| M09.01  | Valle de México | 43  | 1.754659633                                            | 203397.7547                    | 213630.0918                     | 223862.4281                    | 356893.8296                           | 374848.0986                            | 392802.366                            |
| M09.01  | Valle de México | 44  | 1.888654351                                            | 200051.6431                    | 210361.81                       | 220671.9748                    | 377828.4063                           | 397300.7478                            | 416773.0853                           |
| M09.01  | Valle de México | 45  | 2.344174988                                            | 196108.1107                    | 206228.3707                     | 216348.6297                    | 459711.7281                           | 483435.3884                            | 507159.0465                           |
| M09.01  | Valle de México | 46  | 1.566479979                                            | 192257.0764                    | 202468.62                       | 212680.1615                    | 301166.8611                           | 317163.0398                            | 333159.215                            |

| City ID | City name       | Age | Avoidable deaths from respiratory causes mean estimate | Lower value, lost productivity | Center value, lost productivity | Upper value, lost productivity | Lost productivity by age, lower value | Lost productivity by age, center value | Lost productivity by age, upper value |
|---------|-----------------|-----|--------------------------------------------------------|--------------------------------|---------------------------------|--------------------------------|---------------------------------------|----------------------------------------|---------------------------------------|
| M09.01  | Valle de México | 47  | 1.096083472                                            | 187975.9846                    | 198176.371                      | 208376.7552                    | 206037.3698                           | 217217.8448                            | 228398.3172                           |
| M09.01  | Valle de México | 48  | 2.098868246                                            | 183308.4664                    | 193276.0139                     | 203243.5578                    | 384740.3193                           | 405660.8882                            | 426581.4496                           |
| M09.01  | Valle de México | 49  | 2.491401744                                            | 178987.6931                    | 188637.6556                     | 198287.6157                    | 445930.2507                           | 469972.1842                            | 494014.1115                           |
| M09.01  | Valle de México | 50  | 3.532943445                                            | 174524.3331                    | 184002.0308                     | 193479.7259                    | 616584.5985                           | 650068.7684                            | 683552.9292                           |
| M09.01  | Valle de México | 51  | 2.689779075                                            | 169951.4556                    | 179461.9024                     | 188972.3478                    | 457131.8691                           | 482712.8698                            | 508293.8669                           |
| M09.01  | Valle de México | 52  | 3.143662049                                            | 165265.4176                    | 174812.4457                     | 184359.4723                    | 519538.6214                           | 549551.2512                            | 579563.8766                           |
| M09.01  | Valle de México | 53  | 3.292622371                                            | 160459.3637                    | 170008.4343                     | 179557.5034                    | 528332.0905                           | 559773.574                             | 591215.0528                           |
| M09.01  | Valle de México | 54  | 3.389880505                                            | 155606.9173                    | 165142.3231                     | 174677.7274                    | 527488.8553                           | 559812.7416                            | 592136.6229                           |
| M09.01  | Valle de México | 55  | 4.232107495                                            | 150342.9818                    | 159818.2835                     | 169293.5848                    | 636267.6602                           | 676368.1553                            | 716468.6492                           |
| M09.01  | Valle de México | 56  | 3.055126062                                            | 144920.829                     | 154064.2334                     | 163207.6364                    | 442751.4015                           | 470685.6548                            | 498619.9034                           |
| M09.01  | Valle de México | 57  | 3.954099273                                            | 139188.0717                    | 148240.1365                     | 157292.1997                    | 550363.4531                           | 586156.216                             | 621948.9726                           |
| M09.01  | Valle de México | 58  | 3.972368043                                            | 133220.8521                    | 142208.973                      | 151197.0922                    | 529202.2556                           | 564906.3796                            | 600610.4971                           |
| M09.01  | Valle de México | 59  | 3.81764169                                             | 127214.1477                    | 136003.7341                     | 144793.3188                    | 485658.0339                           | 519213.5254                            | 552769.0105                           |

| City ID | City name       | Age | Avoidable deaths from respiratory causes mean estimate | Lower value, lost productivity | Center value, lost productivity | Upper value, lost productivity | Lost productivity by age, lower value | Lost productivity by age, center value | Lost productivity by age, upper value |
|---------|-----------------|-----|--------------------------------------------------------|--------------------------------|---------------------------------|--------------------------------|---------------------------------------|----------------------------------------|---------------------------------------|
| M09.01  | Valle de México | 60  | 4.44709139                                             | 120666.2806                    | 128923.3152                     | 137180.3469                    | 536613.9775                           | 573333.7651                            | 610053.5396                           |
| M09.01  | Valle de México | 61  | 4.92488432                                             | 114456.0587                    | 122623.1191                     | 130790.1765                    | 563682.8487                           | 603904.6766                            | 644126.4893                           |
| M09.01  | Valle de México | 62  | 4.99324729                                             | 108274.8276                    | 116358.2301                     | 124441.6293                    | 540642.9898                           | 581005.4169                            | 621367.8283                           |
| M09.01  | Valle de México | 63  | 6.30779255                                             | 101108.7367                    | 108686.1368                     | 116263.535                     | 637772.9359                           | 685569.6043                            | 733366.26                             |
| M09.01  | Valle de México | 64  | 5.427823138                                            | 94373.35273                    | 101651.6919                     | 108930.0289                    | 512241.8676                           | 551747.4051                            | 591252.9313                           |
| M09.01  | Valle de México | 65  | 6.859078675                                            | 88369.46809                    | 95442.55795                     | 102515.6457                    | 606133.1341                           | 654648.0139                            | 703162.879                            |
| M09.01  | Valle de México | 66  | 6.458400764                                            | 82175.81947                    | 88594.20999                     | 95012.59953                    | 530724.3753                           | 572176.9135                            | 613629.4454                           |
| M09.01  | Valle de México | 67  | 6.727083645                                            | 75057.55895                    | 81248.50716                     | 87439.45438                    | 504918.4772                           | 546565.5037                            | 588212.5234                           |
| M09.01  | Valle de México | 68  | 8.864213885                                            | 68138.5239                     | 74104.64248                     | 80070.76003                    | 603994.4496                           | 656879.4008                            | 709764.3428                           |
| M09.01  | Valle de México | 69  | 7.255455102                                            | 61194.44494                    | 66859.96031                     | 72525.47461                    | 443993.5477                           | 485099.4401                            | 526205.3248                           |
| M09.01  | Valle de México | 70  | 8.811395314                                            | 53988.19233                    | 59204.03396                     | 64419.87326                    | 475711.3049                           | 521670.1474                            | 567628.9693                           |
| M09.01  | Valle de México | 71  | 8.818347071                                            | 47009.1239                     | 51074.25427                     | 55139.38348                    | 414542.77                             | 450390.5006                            | 486238.2208                           |
| M09.01  | Valle de México | 72  | 9.598279571                                            | 39725.32338                    | 42975.32801                     | 46225.33267                    | 381294.7599                           | 412489.2129                            | 443683.6662                           |

| City ID | City name       | Age | Avoidable deaths from respiratory causes mean estimate | Lower value, lost productivity | Center value, lost productivity | Upper value, lost productivity | Lost productivity by age, lower value | Lost productivity by age, center value | Lost productivity by age, upper value |
|---------|-----------------|-----|--------------------------------------------------------|--------------------------------|---------------------------------|--------------------------------|---------------------------------------|----------------------------------------|---------------------------------------|
| M09.01  | Valle de México | 73  | 9.10493331                                             | 31786.64758                    | 34385.24358                     | 36983.83839                    | 289415.3063                           | 313075.3497                            | 336735.3821                           |
| M09.01  | Valle de México | 74  | 10.77874797                                            | 23930.62114                    | 25986.95698                     | 28043.29159                    | 257942.134                            | 280106.8597                            | 302271.5722                           |
| M09.01  | Valle de México | 75  | 11.42840056                                            | 16078.55021                    | 17655.39909                     | 19232.24794                    | 183752.1122                           | 201772.9728                            | 219793.833                            |
| M09.01  | Valle de México | 76  | 10.88193657                                            | 7810.453078                    | 8350.219961                     | 8889.988046                    | 84992.85499                           | 90866.56398                            | 96740.28604                           |
| M09.01  | Valle de México | 77  | 11.14157226                                            | 7810.453078                    | 8350.219961                     | 8889.988046                    | 87020.72737                           | 93034.57911                            | 99048.44422                           |
| M09.01  | Valle de México | 78  | 13.65871072                                            | 7810.453078                    | 8350.219961                     | 8889.988046                    | 106680.7192                           | 114053.2389                            | 121425.775                            |
| M09.01  | Valle de México | 79  | 14.46240181                                            | 7810.453078                    | 8350.219961                     | 8889.988046                    | 112957.9107                           | 120764.2363                            | 128570.5792                           |
| M09.01  | Valle de México | 80  | 14.66444067                                            | 7810.453078                    | 8350.219961                     | 8889.988046                    | 114535.9258                           | 122451.3052                            | 130366.7023                           |
| M09.01  | Valle de México | 81  | 13.83422453                                            | 7810.453078                    | 8350.219961                     | 8889.988046                    | 108051.5616                           | 115518.8178                            | 122986.0907                           |
| M09.01  | Valle de México | 82  | 13.5557371                                             | 7810.453078                    | 8350.219961                     | 8889.988046                    | 105876.4485                           | 113193.3865                            | 120510.3407                           |
| M09.01  | Valle de México | 83  | 13.86404455                                            | 7810.453078                    | 8350.219961                     | 8889.988046                    | 108284.4694                           | 115767.8215                            | 123251.1903                           |
| M09.01  | Valle de México | 84  | 16.88723148                                            | 7810.453078                    | 8350.219961                     | 8889.988046                    | 131896.9291                           | 141012.0974                            | 150127.286                            |
| M09.01  | Valle de México | 85  | 15.98271633                                            | 7810.453078                    | 8350.219961                     | 8889.988046                    | 124832.2559                           | 133459.1969                            | 142086.1571                           |

| City ID | City name       | Age | Avoidable deaths from respiratory causes mean estimate | Lower value, lost productivity | Center value, lost productivity | Upper value, lost productivity | Lost productivity by age, lower value | Lost productivity by age, center value | Lost productivity by age, upper value |
|---------|-----------------|-----|--------------------------------------------------------|--------------------------------|---------------------------------|--------------------------------|---------------------------------------|----------------------------------------|---------------------------------------|
| M09.01  | Valle de México | 86  | 16.28870215                                            | 7810.453078                    | 8350.219961                     | 8889.988046                    | 127222.1439                           | 136014.2459                            | 144806.3674                           |
| M09.01  | Valle de México | 87  | 15.5272218                                             | 7810.453078                    | 8350.219961                     | 8889.988046                    | 121274.6373                           | 129655.7174                            | 138036.8162                           |
| M09.01  | Valle de México | 88  | 13.42619136                                            | 7810.453078                    | 8350.219961                     | 8889.988046                    | 104864.6376                           | 112111.6511                            | 119358.6807                           |
| M09.01  | Valle de México | 89  | 16.1260227                                             | 7810.453078                    | 8350.219961                     | 8889.988046                    | 125951.5436                           | 134655.8367                            | 143360.149                            |
| M09.01  | Valle de México | 90  | 11.96236118                                            | 7810.453078                    | 8350.219961                     | 8889.988046                    | 93431.46071                           | 99888.34712                            | 106345.2479                           |
| M09.01  | Valle de México | 91  | 10.32492069                                            | 7810.453078                    | 8350.219961                     | 8889.988046                    | 80642.30861                           | 86215.35887                            | 91788.42153                           |
| M09.01  | Valle de México | 92  | 11.95507608                                            | 7810.453078                    | 8350.219961                     | 8889.988046                    | 93374.56074                           | 99827.5149                             | 106280.4834                           |
| M09.01  | Valle de México | 93  | 9.317402788                                            | 7810.453078                    | 8350.219961                     | 8889.988046                    | 72773.13728                           | 77802.36275                            | 82831.5994                            |
| M09.01  | Valle de México | 94  | 7.978488718                                            | 7810.453078                    | 8350.219961                     | 8889.988046                    | 62315.61176                           | 66622.13575                            | 70928.66933                           |
| M09.01  | Valle de México | 95  | 6.363843492                                            | 7810.453078                    | 8350.219961                     | 8889.988046                    | 49704.50099                           | 53139.49296                            | 56574.49257                           |
| M09.01  | Valle de México | 96  | 5.041739234                                            | 7810.453078                    | 8350.219961                     | 8889.988046                    | 39378.26772                           | 42099.63159                            | 44821.00152                           |
| M09.01  | Valle de México | 97  | 4.427307606                                            | 7810.453078                    | 8350.219961                     | 8889.988046                    | 34579.27832                           | 36968.99235                            | 39358.71169                           |
| M09.01  | Valle de México | 98  | 2.866167785                                            | 7810.453078                    | 8350.219961                     | 8889.988046                    | 22386.069                             | 23933.13145                            | 25480.19734                           |

| City ID | City name       | Age | Avoidable deaths from respiratory causes mean estimate | Lower value, lost productivity | Center value, lost productivity | Upper value, lost productivity | Lost productivity by age, lower value | Lost productivity by age, center value | Lost productivity by age, upper value |
|---------|-----------------|-----|--------------------------------------------------------|--------------------------------|---------------------------------|--------------------------------|---------------------------------------|----------------------------------------|---------------------------------------|
| M09.01  | Valle de México | 99  | 1.422763819                                            | 7810.453078                    | 8350.219961                     | 8889.988046                    | 11112.43005                           | 11880.39084                            | 12648.35335                           |
| M09.01  | Valle de México | 100 | 2.240616623                                            | 7810.453078                    | 8350.219961                     | 8889.988046                    | 17500.231                             | 18709.64165                            | 19919.055                             |
| M09.01  | Valle de México | 101 | 1.464799923                                            | 7810.453078                    | 8350.219961                     | 8889.988046                    | 11440.75107                           | 12231.40156                            | 13022.0538                            |
| M09.01  | Valle de México | 102 | 0.595690259                                            | 7810.453078                    | 8350.219961                     | 8889.988046                    | 4652.610816                           | 4974.14469                             | 5295.67928                            |
| M09.01  | Valle de México | 103 | 0.646552713                                            | 7810.453078                    | 8350.219961                     | 8889.988046                    | 5049.869625                           | 5398.857367                            | 5747.845886                           |
| M09.01  | Valle de México | 104 | 0.330522543                                            | 7810.453078                    | 8350.219961                     | 8889.988046                    | 2581.530812                           | 2759.935935                            | 2938.341454                           |
| M09.01  | Valle de México | 105 | 0.365337181                                            | 7810.453078                    | 8350.219961                     | 8889.988046                    | 2853.448909                           | 3050.645821                            | 3247.843171                           |
| M09.01  | Valle de México | 106 | 0.101759815                                            | 7810.453078                    | 8350.219961                     | 8889.988046                    | 794.7902619                           | 849.7168403                            | 904.6435408                           |
| M09.01  | Valle de México | 107 | 0.103876524                                            | 7810.453078                    | 8350.219961                     | 8889.988046                    | 811.3227171                           | 867.3918247                            | 923.4610571                           |
| M09.01  | Valle de México | 109 | 0.050536163                                            | 7810.453078                    | 8350.219961                     | 8889.988046                    | 394.7103333                           | 421.9880807                            | 449.2658889                           |
| M09.01  | Valle de México | 110 | 0.06974367                                             | 7810.453078                    | 8350.219961                     | 8889.988046                    | 544.72966                             | 582.3749833                            | 620.0203903                           |
| M09.01  | Valle de México | 111 | 0.050536163                                            | NA                             | NA                              | NA                             | NA                                    | NA                                     | NA                                    |
| M09.01  | Valle de México | 112 | 0.052777566                                            | NA                             | NA                              | NA                             | NA                                    | NA                                     | NA                                    |

| City ID | City name       | Age | Avoidable deaths from respiratory causes mean estimate | Lower value, lost productivity | Center value, lost productivity | Upper value, lost productivity | Lost productivity by age, lower value | Lost productivity by age, center value | Lost productivity by age, upper value |
|---------|-----------------|-----|--------------------------------------------------------|--------------------------------|---------------------------------|--------------------------------|---------------------------------------|----------------------------------------|---------------------------------------|
| M09.01  | Valle de México | 120 | 0.06974367                                             | NA                             | NA                              | NA                             | NA                                    | NA                                     | NA                                    |
| M11.01  | Celaya          | 33  | 0.050668157                                            | 164562.8828                    | 199044.3331                     | 233525.7809                    | 8338.098037                           | 10085.20959                            | 11832.32101                           |
| M11.01  | Celaya          | 34  | 0.050668157                                            | 162869.4688                    | 197819.3323                     | 232769.1945                    | 8252.29587                            | 10023.14105                            | 11793.98616                           |
| M11.01  | Celaya          | 37  | 0.050668157                                            | 156289.953                     | 192358.0974                     | 228426.2404                    | 7918.923926                           | 9746.430343                            | 11573.93669                           |
| M11.01  | Celaya          | 38  | 0.050668157                                            | 153573.0801                    | 189835.5421                     | 226098.0026                    | 7781.264982                           | 9618.61711                             | 11455.96916                           |
| M11.01  | Celaya          | 45  | 0.050668157                                            | 137721.0302                    | 172823.9839                     | 207926.9401                    | 6978.070824                           | 8756.672807                            | 10535.27491                           |
| M11.01  | Celaya          | 46  | 0.050668157                                            | 133451.1703                    | 168798.2523                     | 204145.338                     | 6761.724892                           | 8552.696403                            | 10343.6681                            |
| M11.01  | Celaya          | 48  | 0.152004472                                            | 124782.9167                    | 160266.5509                     | 195750.1878                    | 18967.56136                           | 24361.23244                            | 29754.90394                           |
| M11.01  | Celaya          | 49  | 0.050668157                                            | 120325.9872                    | 155593.3074                     | 190860.6292                    | 6096.696048                           | 7883.626176                            | 9670.556385                           |
| M11.01  | Celaya          | 50  | 0.152004472                                            | 116212.2612                    | 151335.8685                     | 186459.4762                    | 17664.7834                            | 23003.72878                            | 28342.67422                           |
| M11.01  | Celaya          | 53  | 0.202672629                                            | 103114.1522                    | 138576.4078                     | 174038.664                     | 20898.41634                           | 28085.64494                            | 35272.87362                           |
| M11.01  | Celaya          | 55  | 0.202672629                                            | 96478.33716                    | 131086.7458                     | 165695.1536                    | 19553.51826                           | 26567.69543                            | 33581.87244                           |
| M11.01  | Celaya          | 56  | 0.101336315                                            | 92083.46136                    | 126430.1725                     | 160776.8829                    | 9331.398613                           | 12811.96774                            | 16292.53679                           |
| M11.01  | Celaya          | 57  | 0.050668157                                            | 86469.13353                    | 120485.5583                     | 154501.9822                    | 4381.231661                           | 6104.781222                            | 7828.330741                           |
| M11.01  | Celaya          | 58  | 0.101336315                                            | 82689.51903                    | 116702.5967                     | 150715.6735                    | 8379.451118                           | 11826.21106                            | 15272.97091                           |
| M11.01  | Celaya          | 59  | 0.050668157                                            | 77179.29911                    | 110760.4652                     | 144341.6292                    | 3910.532869                           | 5612.028677                            | 7313.524379                           |
| M11.01  | Celaya          | 60  | 0.202672629                                            | 74977.53985                    | 108473.3182                     | 141969.0943                    | 15195.89514                           | 21984.5726                             | 28773.24962                           |
| M11.01  | Celaya          | 61  | 0.152004472                                            | 71578.76051                    | 104834.3428                     | 138089.9229                    | 10880.2917                            | 15935.28893                            | 20990.28582                           |
| M11.01  | Celaya          | 62  | 0.101336315                                            | 67197.55749                    | 99633.80659                     | 132070.0546                    | 6809.552829                           | 10096.52277                            | 13383.49261                           |
| M11.01  | Celaya          | 65  | 0.152004472                                            | 53197.89069                    | 83664.90807                     | 114131.9217                    | 8086.317284                           | 12717.44017                            | 17348.5625                            |
| M11.01  | Celaya          | 66  | 0.152004472                                            | 49370.67305                    | 78448.66083                     | 107526.6435                    | 7504.563087                           | 11924.54727                            | 16344.53067                           |

| City ID | City name | Age | Avoidable deaths from respiratory causes mean estimate | Lower value, lost productivity | Center value, lost productivity | Upper value, lost productivity | Lost productivity by age, lower value | Lost productivity by age, center value | Lost productivity by age, upper value |
|---------|-----------|-----|--------------------------------------------------------|--------------------------------|---------------------------------|--------------------------------|---------------------------------------|----------------------------------------|---------------------------------------|
| M11.01  | Celaya    | 67  | 0.050668157                                            | 47340.72625                    | 67026.01698                     | 86711.2988                     | 2398.667365                           | 3396.084773                            | 4393.501729                           |
| M11.01  | Celaya    | 68  | 0.202672629                                            | 45873.57588                    | 63166.44084                     | 80459.29785                    | 9297.318239                           | 12802.10865                            | 16306.89745                           |
| M11.01  | Celaya    | 69  | 0.101336315                                            | 38931.50529                    | 54497.89436                     | 70064.27773                    | 3945.17527                            | 5522.615771                            | 7100.055693                           |
| M11.01  | Celaya    | 70  | 0.304008944                                            | 31236.64862                    | 43814.21007                     | 56391.77058                    | 9496.220558                           | 13319.91173                            | 17143.60262                           |
| M11.01  | Celaya    | 71  | 0.152004472                                            | 28060.88471                    | 37982.89267                     | 47904.89843                    | 4265.379964                           | 5773.569544                            | 7281.758791                           |
| M11.01  | Celaya    | 72  | 0.050668157                                            | 21223.51218                    | 29731.8699                      | 38240.22535                    | 1075.356254                           | 1506.459061                            | 1937.561754                           |
| M11.01  | Celaya    | 73  | 0.253340787                                            | 16775.86407                    | 23859.38141                     | 30942.89766                    | 4250.010599                           | 6044.554455                            | 7839.098032                           |
| M11.01  | Celaya    | 74  | 0.253340787                                            | 12504.25299                    | 17181.44276                     | 21858.63139                    | 3167.837289                           | 4352.760223                            | 5537.682871                           |
| M11.01  | Celaya    | 75  | 0.152004472                                            | 7886.116283                    | 11881.30584                     | 15876.49423                    | 1198.724941                           | 1806.01162                             | 2413.298122                           |
| M11.01  | Celaya    | 76  | 0.152004472                                            | 4092.690627                    | 5208.45214                      | 6324.212453                    | 622.1072776                           | 791.7080173                            | 961.3085745                           |
| M11.01  | Celaya    | 77  | 0.304008944                                            | 4092.690627                    | 5208.45214                      | 6324.212453                    | 1244.214555                           | 1583.416035                            | 1922.617149                           |
| M11.01  | Celaya    | 78  | 0.253340787                                            | 4092.690627                    | 5208.45214                      | 6324.212453                    | 1036.845463                           | 1319.513362                            | 1602.180957                           |
| M11.01  | Celaya    | 79  | 0.202672629                                            | 4092.690627                    | 5208.45214                      | 6324.212453                    | 829.4763702                           | 1055.61069                             | 1281.744766                           |
| M11.01  | Celaya    | 80  | 0.202672629                                            | 4092.690627                    | 5208.45214                      | 6324.212453                    | 829.4763702                           | 1055.61069                             | 1281.744766                           |
| M11.01  | Celaya    | 81  | 0.202672629                                            | 4092.690627                    | 5208.45214                      | 6324.212453                    | 829.4763702                           | 1055.61069                             | 1281.744766                           |
| M11.01  | Celaya    | 82  | 0.405345259                                            | 4092.690627                    | 5208.45214                      | 6324.212453                    | 1658.95274                            | 2111.22138                             | 2563.489532                           |
| M11.01  | Celaya    | 83  | 0.354677101                                            | 4092.690627                    | 5208.45214                      | 6324.212453                    | 1451.583648                           | 1847.318707                            | 2243.05334                            |
| M11.01  | Celaya    | 84  | 0.354677101                                            | 4092.690627                    | 5208.45214                      | 6324.212453                    | 1451.583648                           | 1847.318707                            | 2243.05334                            |
| M11.01  | Celaya    | 85  | 0.304008944                                            | 4092.690627                    | 5208.45214                      | 6324.212453                    | 1244.214555                           | 1583.416035                            | 1922.617149                           |
| M11.01  | Celaya    | 86  | 0.304008944                                            | 4092.690627                    | 5208.45214                      | 6324.212453                    | 1244.214555                           | 1583.416035                            | 1922.617149                           |
| M11.01  | Celaya    | 87  | 0.253340787                                            | 4092.690627                    | 5208.45214                      | 6324.212453                    | 1036.845463                           | 1319.513362                            | 1602.180957                           |
| M11.01  | Celaya    | 88  | 0.354677101                                            | 4092.690627                    | 5208.45214                      | 6324.212453                    | 1451.583648                           | 1847.318707                            | 2243.05334                            |



| City ID | City name | Age | Avoidable deaths from respiratory causes mean estimate | Lower value, lost productivity | Center value, lost productivity | Upper value, lost productivity | Lost productivity by age, lower value | Lost productivity by age, center value | Lost productivity by age, upper value |
|---------|-----------|-----|--------------------------------------------------------|--------------------------------|---------------------------------|--------------------------------|---------------------------------------|----------------------------------------|---------------------------------------|
| M11.01  | Celaya    | 89  | 0.253340787                                            | 4092.690627                    | 5208.45214                      | 6324.212453                    | 1036.845463                           | 1319.513362                            | 1602.180957                           |
| M11.01  | Celaya    | 90  | 0.253340787                                            | 4092.690627                    | 5208.45214                      | 6324.212453                    | 1036.845463                           | 1319.513362                            | 1602.180957                           |
| M11.01  | Celaya    | 91  | 0.253340787                                            | 4092.690627                    | 5208.45214                      | 6324.212453                    | 1036.845463                           | 1319.513362                            | 1602.180957                           |
| M11.01  | Celaya    | 92  | 0.202672629                                            | 4092.690627                    | 5208.45214                      | 6324.212453                    | 829.4763702                           | 1055.61069                             | 1281.744766                           |
| M11.01  | Celaya    | 93  | 0.050668157                                            | 4092.690627                    | 5208.45214                      | 6324.212453                    | 207.3690925                           | 263.9026724                            | 320.4361915                           |
| M11.01  | Celaya    | 94  | 0.202672629                                            | 4092.690627                    | 5208.45214                      | 6324.212453                    | 829.4763702                           | 1055.61069                             | 1281.744766                           |
| M11.01  | Celaya    | 97  | 0.101336315                                            | 4092.690627                    | 5208.45214                      | 6324.212453                    | 414.7381851                           | 527.8053449                            | 640.872383                            |
| M11.01  | Celaya    | 98  | 0.152004472                                            | 4092.690627                    | 5208.45214                      | 6324.212453                    | 622.1072776                           | 791.7080173                            | 961.3085745                           |
| M11.01  | Celaya    | 99  | 0.050668157                                            | 4092.690627                    | 5208.45214                      | 6324.212453                    | 207.3690925                           | 263.9026724                            | 320.4361915                           |
| M11.01  | Celaya    | 100 | 0.101336315                                            | 4092.690627                    | 5208.45214                      | 6324.212453                    | 414.7381851                           | 527.8053449                            | 640.872383                            |
| M11.03  | León      | 30  | 0.042849035                                            | 187781.5834                    | 198982.5843                     | 210183.5812                    | 8046.259547                           | 8526.211619                            | 9006.163524                           |
| M11.03  | León      | 31  | 0.042849035                                            | 186458.1199                    | 197673.63                       | 208889.136                     | 7989.550415                           | 8470.124193                            | 8950.697797                           |
| M11.03  | León      | 32  | 0.042849035                                            | 184694.6863                    | 195894.2826                     | 207093.8748                    | 7913.988988                           | 8393.880876                            | 8873.772587                           |
| M11.03  | León      | 34  | 0.085698069                                            | 180684.343                     | 191903.351                      | 203122.3559                    | 15484.2993                            | 16445.74662                            | 17407.19367                           |
| M11.03  | León      | 35  | 0.130009774                                            | 178717.998                     | 189969.7573                     | 201221.5145                    | 23235.08662                           | 24697.9253                             | 26160.76372                           |
| M11.03  | León      | 36  | 0.128547104                                            | 176162.2265                    | 187420.061                      | 198677.8947                    | 22645.14397                           | 24092.30599                            | 25539.4679                            |
| M11.03  | León      | 37  | 0.085698069                                            | 173646.3712                    | 184897.7224                     | 196149.0729                    | 14881.1587                            | 15845.37778                            | 16809.59678                           |
| M11.03  | León      | 38  | 0.042849035                                            | 170775.9669                    | 182056.19                       | 193336.4134                    | 7317.585298                           | 7800.931966                            | 8284.27865                            |
| M11.03  | León      | 39  | 0.085698069                                            | 167850.3829                    | 179092.6634                     | 190334.9444                    | 14384.45369                           | 15347.89543                            | 16311.3372                            |
| M11.03  | León      | 40  | 0.08716074                                             | 172965.4184                    | 184550.7333                     | 196136.0486                    | 15075.79386                           | 16085.57848                            | 17095.36313                           |
| M11.03  | León      | 43  | 0.085698069                                            | 163531.7818                    | 175251.9438                     | 186972.1076                    | 14014.35792                           | 15018.75317                            | 16023.14858                           |
| M11.03  | León      | 44  | 0.128547104                                            | 160232.5947                    | 171992.4708                     | 183752.3488                    | 20597.43593                           | 22109.13395                            | 23620.8322                            |

| City ID | City name | Age | Avoidable deaths from respiratory causes mean estimate | Lower value, lost productivity | Center value, lost productivity | Upper value, lost productivity | Lost productivity by age, lower value | Lost productivity by age, center value | Lost productivity by age, upper value |
|---------|-----------|-----|--------------------------------------------------------|--------------------------------|---------------------------------|--------------------------------|---------------------------------------|----------------------------------------|---------------------------------------|
| M11.03  | León      | 45  | 0.128547104                                            | 156957.1016                    | 168764.4325                     | 180571.7652                    | 20176.38079                           | 21694.17898                            | 23211.9774                            |
| M11.03  | León      | 46  | 0.085698069                                            | 152881.0446                    | 164736.3658                     | 176591.6888                    | 13101.61031                           | 14117.58844                            | 15133.56674                           |
| M11.03  | León      | 47  | 0.042849035                                            | 148998.8142                    | 160865.0424                     | 172731.2713                    | 6384.455332                           | 6892.911752                            | 7401.368204                           |
| M11.03  | León      | 48  | 0.302868583                                            | 145540.2031                    | 157244.8872                     | 168949.5708                    | 44079.55514                           | 47624.53624                            | 51169.51719                           |
| M11.03  | León      | 49  | 0.128547104                                            | 141798.004                     | 153384.0464                     | 164970.087                     | 18227.7227                            | 19717.07489                            | 21206.42685                           |
| M11.03  | León      | 50  | 0.128547104                                            | 137170.028                     | 148420.6028                     | 159671.177                     | 17632.80979                           | 19079.03859                            | 20525.26732                           |
| M11.03  | León      | 51  | 0.042849035                                            | 133308.9592                    | 144519.8906                     | 155730.8214                    | 5712.160192                           | 6192.537779                            | 6672.915342                           |
| M11.03  | León      | 52  | 0.172858809                                            | 129396.7395                    | 140440.1265                     | 151483.5117                    | 22367.36627                           | 24276.313                              | 26185.25941                           |
| M11.03  | León      | 53  | 0.128547104                                            | 125481.5954                    | 136352.4227                     | 147223.2483                    | 16130.29563                           | 17527.709                              | 18925.12213                           |
| M11.03  | León      | 54  | 0.172858809                                            | 120675.2546                    | 131214.7818                     | 141754.3083                    | 20859.78079                           | 22681.63091                            | 24503.48091                           |
| M11.03  | León      | 55  | 0.301405913                                            | 116411.9433                    | 126848.1075                     | 137284.2723                    | 35087.24799                           | 38232.7696                             | 41378.29137                           |
| M11.03  | León      | 56  | 0.644198189                                            | 112493.08                      | 122788.7571                     | 133084.436                     | 72467.83837                           | 79100.29492                            | 85732.75261                           |
| M11.03  | León      | 57  | 0.171396138                                            | 107401.8155                    | 117502.8703                     | 127603.9269                    | 18408.25639                           | 20139.53817                            | 21870.82027                           |
| M11.03  | León      | 58  | 0.171396138                                            | 102410.419                     | 112318.6454                     | 122226.8737                    | 17552.75031                           | 19250.98205                            | 20949.21411                           |
| M11.03  | León      | 59  | 0.26148222                                             | 97507.52666                    | 107178.8444                     | 116850.1654                    | 25496.48453                           | 28025.36217                            | 30554.24064                           |
| M11.03  | León      | 60  | 0.385641311                                            | 92290.1904                     | 101285.0976                     | 110280.0093                    | 35590.90998                           | 39059.71777                            | 42528.5273                            |
| M11.03  | León      | 61  | 0.387103982                                            | 87333.51671                    | 96248.23836                     | 105162.9646                    | 33807.15204                           | 37258.07628                            | 40709.00232                           |
| M11.03  | León      | 62  | 0.514188414                                            | 81728.17643                    | 90364.84608                     | 99001.51927                    | 42023.68142                           | 46464.55689                            | 50905.43418                           |
| M11.03  | León      | 63  | 0.387103982                                            | 76095.09324                    | 84285.83525                     | 92476.58214                    | 29456.71357                           | 32627.38241                            | 35798.05314                           |
| M11.03  | León      | 64  | 0.299943242                                            | 71413.20693                    | 79228.67022                     | 87044.13855                    | 21419.90877                           | 23764.10417                            | 26108.30107                           |
| M11.03  | León      | 65  | 0.472802051                                            | 66392.89601                    | 73838.50612                     | 81284.12019                    | 31390.69738                           | 34910.9971                             | 38431.2987                            |
| M11.03  | León      | 66  | 0.47133938                                             | 61572.35978                    | 68885.17562                     | 76197.99552                    | 29021.47786                           | 32468.29594                            | 35915.11593                           |

| City ID | City name | Age | Avoidable deaths from respiratory causes mean estimate | Lower value, lost productivity | Center value, lost productivity | Upper value, lost productivity | Lost productivity by age, lower value | Lost productivity by age, center value | Lost productivity by age, upper value |
|---------|-----------|-----|--------------------------------------------------------|--------------------------------|---------------------------------|--------------------------------|---------------------------------------|----------------------------------------|---------------------------------------|
| M11.03  | León      | 67  | 0.387103982                                            | 55897.6949                     | 62956.42097                     | 70015.14998                    | 21638.22026                           | 24370.68122                            | 27103.14332                           |
| M11.03  | León      | 68  | 0.214245173                                            | 49666.94307                    | 55483.68985                     | 61300.43967                    | 10640.90279                           | 11887.1127                             | 13133.32327                           |
| M11.03  | León      | 69  | 0.557037449                                            | 44286.31316                    | 49395.98393                     | 54505.65783                    | 24669.13489                           | 27515.41286                            | 30361.69257                           |
| M11.03  | León      | 70  | 0.472802051                                            | 39086.37259                    | 43117.83488                     | 47149.30163                    | 18480.11711                           | 20386.20074                            | 22292.28649                           |
| M11.03  | León      | 71  | 0.729896258                                            | 34344.34761                    | 37911.51018                     | 41478.67735                    | 25067.81079                           | 27671.4694                             | 30275.13137                           |
| M11.03  | León      | 72  | 0.688509894                                            | 29159.43271                    | 32203.86341                     | 35248.2976                     | 20076.55793                           | 22172.67858                            | 24268.80165                           |
| M11.03  | León      | 73  | 0.858443361                                            | 22098.14974                    | 24465.85195                     | 26833.55653                    | 18970.00993                           | 21002.54818                            | 23035.08846                           |
| M11.03  | León      | 74  | 0.55850012                                             | 16179.19411                    | 18052.63793                     | 19926.08295                    | 9036.081846                           | 10082.40044                            | 11128.71971                           |
| M11.03  | León      | 75  | 0.815594327                                            | 11034.15262                    | 12222.94043                     | 13411.72823                    | 8999.392274                           | 9968.960865                            | 10938.52946                           |
| M11.03  | León      | 76  | 0.64566086                                             | 5687.562856                    | 6308.283484                     | 6929.004112                    | 3672.236722                           | 4073.011736                            | 4473.786751                           |
| M11.03  | León      | 77  | 0.815594327                                            | 5687.562856                    | 6308.283484                     | 6929.004112                    | 4638.743997                           | 5145.00022                             | 5651.256443                           |
| M11.03  | León      | 78  | 0.687047223                                            | 5687.562856                    | 6308.283484                     | 6929.004112                    | 3907.624266                           | 4334.08865                             | 4760.553034                           |
| M11.03  | León      | 79  | 0.691435236                                            | 5687.562856                    | 6308.283484                     | 6929.004112                    | 3932.581365                           | 4361.769479                            | 4790.957593                           |
| M11.03  | León      | 80  | 0.901292396                                            | 5687.562856                    | 6308.283484                     | 6929.004112                    | 5126.157151                           | 5685.607933                            | 6245.058715                           |
| M11.03  | León      | 81  | 1.029839499                                            | 5687.562856                    | 6308.283484                     | 6929.004112                    | 5857.276883                           | 6496.519503                            | 7135.762124                           |
| M11.03  | León      | 82  | 0.818519669                                            | 5687.562856                    | 6308.283484                     | 6929.004112                    | 4655.382063                           | 5163.454106                            | 5671.526149                           |
| M11.03  | León      | 83  | 1.029839499                                            | 5687.562856                    | 6308.283484                     | 6929.004112                    | 5857.276883                           | 6496.519503                            | 7135.762124                           |
| M11.03  | León      | 84  | 1.288396377                                            | 5687.562856                    | 6308.283484                     | 6929.004112                    | 7327.835378                           | 8127.569587                            | 8927.303795                           |
| M11.03  | León      | 85  | 1.119925581                                            | 5687.562856                    | 6308.283484                     | 6929.004112                    | 6369.647136                           | 7064.808046                            | 7759.968956                           |
| M11.03  | León      | 86  | 0.814131656                                            | 5687.562856                    | 6308.283484                     | 6929.004112                    | 4630.424964                           | 5135.773277                            | 5641.12159                            |
| M11.03  | León      | 87  | 0.772745292                                            | 5687.562856                    | 6308.283484                     | 6929.004112                    | 4395.03742                            | 4874.696363                            | 5354.355306                           |
| M11.03  | León      | 88  | 0.775670634                                            | 5687.562856                    | 6308.283484                     | 6929.004112                    | 4411.675486                           | 4893.15025                             | 5374.625013                           |

| City ID | City name | Age | Avoidable deaths from respiratory causes mean estimate | Lower value, lost productivity | Center value, lost productivity | Upper value, lost productivity | Lost productivity by age, lower value | Lost productivity by age, center value | Lost productivity by age, upper value |
|---------|-----------|-----|--------------------------------------------------------|--------------------------------|---------------------------------|--------------------------------|---------------------------------------|----------------------------------------|---------------------------------------|
| M11.03  | León      | 89  | 0.858443361                                            | 5687.562856                    | 6308.283484                     | 6929.004112                    | 4882.450574                           | 5415.304077                            | 5948.157579                           |
| M11.03  | León      | 90  | 0.991378478                                            | 5687.562856                    | 6308.283484                     | 6929.004112                    | 5638.527405                           | 6253.896476                            | 6869.265547                           |
| M11.03  | León      | 91  | 1.204160979                                            | 5687.562856                    | 6308.283484                     | 6929.004112                    | 6848.741257                           | 7596.188816                            | 8343.636376                           |
| M11.03  | León      | 92  | 0.899829725                                            | 5687.562856                    | 6308.283484                     | 6929.004112                    | 5117.838118                           | 5676.38099                             | 6234.923862                           |
| M11.03  | León      | 93  | 0.515651085                                            | 5687.562856                    | 6308.283484                     | 6929.004112                    | 2932.797958                           | 3252.873223                            | 3572.948489                           |
| M11.03  | León      | 94  | 0.605737167                                            | 5687.562856                    | 6308.283484                     | 6929.004112                    | 3445.168211                           | 3821.161766                            | 4197.155321                           |
| M11.03  | León      | 95  | 0.55850012                                             | 5687.562856                    | 6308.283484                     | 6929.004112                    | 3176.504535                           | 3523.17708                             | 3869.849625                           |
| M11.03  | León      | 96  | 0.344254947                                            | 5687.562856                    | 6308.283484                     | 6929.004112                    | 1957.97165                            | 2171.657797                            | 2385.343944                           |
| M11.03  | León      | 97  | 0.215707843                                            | 5687.562856                    | 6308.283484                     | 6929.004112                    | 1226.851918                           | 1360.746227                            | 1494.640535                           |
| M11.03  | León      | 98  | 0.085698069                                            | 5687.562856                    | 6308.283484                     | 6929.004112                    | 487.4131541                           | 540.6077134                            | 593.8022726                           |
| M11.03  | León      | 99  | 0.171396138                                            | 5687.562856                    | 6308.283484                     | 6929.004112                    | 974.8263082                           | 1081.215427                            | 1187.604545                           |
| M11.03  | León      | 101 | 0.128547104                                            | 5687.562856                    | 6308.283484                     | 6929.004112                    | 731.1197312                           | 810.91157                              | 890.7034089                           |
| M11.03  | León      | 102 | 0.085698069                                            | 5687.562856                    | 6308.283484                     | 6929.004112                    | 487.4131541                           | 540.6077134                            | 593.8022726                           |
| M11.03  | León      | 104 | 0.042849035                                            | 5687.562856                    | 6308.283484                     | 6929.004112                    | 243.7065771                           | 270.3038567                            | 296.9011363                           |
| M13.01  | Pachuca   | 30  | 0.041384125                                            | 231489.1722                    | 246345.1764                     | 261201.182                     | 9579.976822                           | 10194.77956                            | 10809.58235                           |
| M13.01  | Pachuca   | 38  | 0.041384125                                            | 210596.2818                    | 225593.445                      | 240590.6085                    | 8715.342838                           | 9335.987312                            | 9956.631802                           |
| M13.01  | Pachuca   | 40  | 0.041384125                                            | 213447.1799                    | 229021.8647                     | 244596.5513                    | 8833.324759                           | 9477.869462                            | 10122.41424                           |
| M13.01  | Pachuca   | 41  | 0.041384125                                            | 210240.5544                    | 225686.6364                     | 241132.7214                    | 8700.621371                           | 9339.843957                            | 9979.066668                           |
| M13.01  | Pachuca   | 42  | 0.041384125                                            | 207142.4614                    | 222387.8812                     | 237633.304                     | 8572.4095                             | 9203.327857                            | 9834.246342                           |
| M13.01  | Pachuca   | 44  | 0.041384125                                            | 199808.661                     | 214939.9059                     | 230071.154                     | 8268.906591                           | 8895.099917                            | 9521.293379                           |
| M13.01  | Pachuca   | 45  | 0.041384125                                            | 195797.9978                    | 210906.976                      | 226015.9576                    | 8102.928803                           | 8728.200644                            | 9353.472624                           |
| M13.01  | Pachuca   | 47  | 0.08276825                                             | 187382.9875                    | 202662.1191                     | 217941.2531                    | 15509.36193                           | 16773.98891                            | 18038.61609                           |

| City ID | City name | Age | Avoidable deaths from respiratory causes mean estimate | Lower value, lost productivity | Center value, lost productivity | Upper value, lost productivity | Lost productivity by age, lower value | Lost productivity by age, center value | Lost productivity by age, upper value |
|---------|-----------|-----|--------------------------------------------------------|--------------------------------|---------------------------------|--------------------------------|---------------------------------------|----------------------------------------|---------------------------------------|
| M13.01  | Pachuca   | 48  | 0.041384125                                            | 182583.8433                    | 197514.0174                     | 212444.1927                    | 7556.07258                            | 8173.944772                            | 8791.81701                            |
| M13.01  | Pachuca   | 50  | 0.08276825                                             | 173966.2803                    | 188774.8744                     | 203583.4697                    | 14398.88456                           | 15624.56597                            | 16850.24749                           |
| M13.01  | Pachuca   | 51  | 0.124152375                                            | 168742.7661                    | 183437.4949                     | 198132.2237                    | 20949.81514                           | 22774.20062                            | 24598.58609                           |
| M13.01  | Pachuca   | 53  | 0.041384125                                            | 156997.7738                    | 171527.8377                     | 186057.9016                    | 6497.215486                           | 7098.529465                            | 7699.843445                           |
| M13.01  | Pachuca   | 54  | 0.124152375                                            | 150737.1343                    | 165250.9591                     | 179764.7838                    | 18714.37319                           | 20516.29901                            | 22318.22482                           |
| M13.01  | Pachuca   | 56  | 0.041384125                                            | 138323.2649                    | 152805.1538                     | 167287.0428                    | 5724.387275                           | 6323.707576                            | 6923.027877                           |
| M13.01  | Pachuca   | 57  | 0.08276825                                             | 131895.4838                    | 146263.3141                     | 160631.1445                    | 10916.75836                           | 12105.95853                            | 13295.1587                            |
| M13.01  | Pachuca   | 58  | 0.041384125                                            | 125982.6033                    | 139706.1063                     | 153429.6107                    | 5213.679793                           | 5781.614959                            | 6349.550176                           |
| M13.01  | Pachuca   | 59  | 0.041384125                                            | 119681.3121                    | 133252.2611                     | 146823.2114                    | 4952.906372                           | 5514.528221                            | 6076.150122                           |
| M13.01  | Pachuca   | 60  | 0.124152375                                            | 113221.7241                    | 126525.1918                     | 139828.662                     | 14056.74593                           | 15708.40303                            | 17360.06045                           |
| M13.01  | Pachuca   | 62  | 0.124152375                                            | 102340.4084                    | 114816.2812                     | 127292.1542                    | 12705.80474                           | 14254.71398                            | 15803.62324                           |
| M13.01  | Pachuca   | 63  | 0.041384125                                            | 95209.51066                    | 107234.8354                     | 119260.1604                    | 3940.162284                           | 4437.819825                            | 4935.477376                           |
| M13.01  | Pachuca   | 65  | 0.1655365                                              | 81560.30805                    | 93266.0675                      | 104971.8272                    | 13501.20791                           | 15438.93836                            | 17376.66884                           |
| M13.01  | Pachuca   | 66  | 0.041384125                                            | 75979.95226                    | 86579.96225                     | 97179.97123                    | 3144.363837                           | 3583.035974                            | 4021.70807                            |
| M13.01  | Pachuca   | 67  | 0.041384125                                            | 70210.64602                    | 79972.97053                     | 89735.294                      | 2905.606147                           | 3309.611404                            | 3713.616618                           |
| M13.01  | Pachuca   | 68  | 0.124152375                                            | 62518.74006                    | 71051.13981                     | 79583.53849                    | 7761.850047                           | 8821.16774                             | 9880.485299                           |
| M13.01  | Pachuca   | 69  | 0.041384125                                            | 56074.72817                    | 64090.79364                     | 72106.858                      | 2320.603556                           | 2652.341411                            | 2984.07922                            |
| M13.01  | Pachuca   | 71  | 0.1655365                                              | 44094.09145                    | 49835.04917                     | 55576.00696                    | 7299.181557                           | 8249.519603                            | 9199.857661                           |
| M13.01  | Pachuca   | 72  | 0.24830475                                             | 36647.17555                    | 41718.09569                     | 46789.01589                    | 9099.667749                           | 10358.8013                             | 11617.93487                           |
| M13.01  | Pachuca   | 73  | 0.041384125                                            | 29174.56911                    | 33585.39366                     | 37996.21828                    | 1207.364013                           | 1389.902127                            | 1572.440244                           |
| M13.01  | Pachuca   | 74  | 0.289688875                                            | 20408.99619                    | 23954.75693                     | 27500.51649                    | 5912.259138                           | 6939.426574                            | 7966.593672                           |
| M13.01  | Pachuca   | 75  | 0.1655365                                              | 12295.16605                    | 14499.63272                     | 16704.09819                    | 2035.298751                           | 2400.218448                            | 2765.137945                           |

| City ID | City name | Age | Avoidable deaths from respiratory causes mean estimate | Lower value, lost productivity | Center value, lost productivity | Upper value, lost productivity | Lost productivity by age, lower value | Lost productivity by age, center value | Lost productivity by age, upper value |
|---------|-----------|-----|--------------------------------------------------------|--------------------------------|---------------------------------|--------------------------------|---------------------------------------|----------------------------------------|---------------------------------------|
| M13.01  | Pachuca   | 76  | 0.041384125                                            | 7535.546577                    | 8299.691568                     | 9063.836558                    | 311.852001                            | 343.4754727                            | 375.0989445                           |
| M13.01  | Pachuca   | 77  | 0.24830475                                             | 7535.546577                    | 8299.691568                     | 9063.836558                    | 1871.112006                           | 2060.852836                            | 2250.593667                           |
| M13.01  | Pachuca   | 78  | 0.24830475                                             | 7535.546577                    | 8299.691568                     | 9063.836558                    | 1871.112006                           | 2060.852836                            | 2250.593667                           |
| M13.01  | Pachuca   | 79  | 0.24830475                                             | 7535.546577                    | 8299.691568                     | 9063.836558                    | 1871.112006                           | 2060.852836                            | 2250.593667                           |
| M13.01  | Pachuca   | 80  | 0.24830475                                             | 7535.546577                    | 8299.691568                     | 9063.836558                    | 1871.112006                           | 2060.852836                            | 2250.593667                           |
| M13.01  | Pachuca   | 81  | 0.496609499                                            | 7535.546577                    | 8299.691568                     | 9063.836558                    | 3742.224012                           | 4121.705673                            | 4501.187334                           |
| M13.01  | Pachuca   | 83  | 0.041384125                                            | 7535.546577                    | 8299.691568                     | 9063.836558                    | 311.852001                            | 343.4754727                            | 375.0989445                           |
| M13.01  | Pachuca   | 84  | 0.24830475                                             | 7535.546577                    | 8299.691568                     | 9063.836558                    | 1871.112006                           | 2060.852836                            | 2250.593667                           |
| M13.01  | Pachuca   | 85  | 0.1655365                                              | 7535.546577                    | 8299.691568                     | 9063.836558                    | 1247.408004                           | 1373.901891                            | 1500.395778                           |
| M13.01  | Pachuca   | 86  | 0.041384125                                            | 7535.546577                    | 8299.691568                     | 9063.836558                    | 311.852001                            | 343.4754727                            | 375.0989445                           |
| M13.01  | Pachuca   | 87  | 0.041384125                                            | 7535.546577                    | 8299.691568                     | 9063.836558                    | 311.852001                            | 343.4754727                            | 375.0989445                           |
| M13.01  | Pachuca   | 88  | 0.124152375                                            | 7535.546577                    | 8299.691568                     | 9063.836558                    | 935.556003                            | 1030.426418                            | 1125.296833                           |
| M13.01  | Pachuca   | 89  | 0.124152375                                            | 7535.546577                    | 8299.691568                     | 9063.836558                    | 935.556003                            | 1030.426418                            | 1125.296833                           |
| M13.01  | Pachuca   | 90  | 0.124152375                                            | 7535.546577                    | 8299.691568                     | 9063.836558                    | 935.556003                            | 1030.426418                            | 1125.296833                           |
| M13.01  | Pachuca   | 91  | 0.289688875                                            | 7535.546577                    | 8299.691568                     | 9063.836558                    | 2182.964007                           | 2404.328309                            | 2625.692611                           |
| M13.01  | Pachuca   | 92  | 0.1655365                                              | 7535.546577                    | 8299.691568                     | 9063.836558                    | 1247.408004                           | 1373.901891                            | 1500.395778                           |
| M13.01  | Pachuca   | 93  | 0.24830475                                             | 7535.546577                    | 8299.691568                     | 9063.836558                    | 1871.112006                           | 2060.852836                            | 2250.593667                           |
| M13.01  | Pachuca   | 94  | 0.124152375                                            | 7535.546577                    | 8299.691568                     | 9063.836558                    | 935.556003                            | 1030.426418                            | 1125.296833                           |
| M13.01  | Pachuca   | 95  | 0.1655365                                              | 7535.546577                    | 8299.691568                     | 9063.836558                    | 1247.408004                           | 1373.901891                            | 1500.395778                           |
| M13.01  | Pachuca   | 96  | 0.041384125                                            | 7535.546577                    | 8299.691568                     | 9063.836558                    | 311.852001                            | 343.4754727                            | 375.0989445                           |
| M13.01  | Pachuca   | 97  | 0.08276825                                             | 7535.546577                    | 8299.691568                     | 9063.836558                    | 623.704002                            | 686.9509455                            | 750.1978889                           |
| M13.01  | Pachuca   | 98  | 0.08276825                                             | 7535.546577                    | 8299.691568                     | 9063.836558                    | 623.704002                            | 686.9509455                            | 750.1978889                           |

| City ID | City name   | Age | Avoidable deaths from respiratory causes mean estimate | Lower value, lost productivity | Center value, lost productivity | Upper value, lost productivity | Lost productivity by age, lower value | Lost productivity by age, center value | Lost productivity by age, upper value |
|---------|-------------|-----|--------------------------------------------------------|--------------------------------|---------------------------------|--------------------------------|---------------------------------------|----------------------------------------|---------------------------------------|
| M13.01  | Pachuca     | 100 | 0.124152375                                            | 7535.546577                    | 8299.691568                     | 9063.836558                    | 935.556003                            | 1030.426418                            | 1125.296833                           |
| M13.01  | Pachuca     | 101 | 0.041384125                                            | 7535.546577                    | 8299.691568                     | 9063.836558                    | 311.852001                            | 343.4754727                            | 375.0989445                           |
| M13.01  | Pachuca     | 107 | 0.041384125                                            | 7535.546577                    | 8299.691568                     | 9063.836558                    | 311.852001                            | 343.4754727                            | 375.0989445                           |
| M13.02  | Tula        | 41  | NA                                                     | NA                             | NA                              | NA                             | NA                                    | NA                                     | NA                                    |
| M13.02  | Tula        | 51  | NA                                                     | NA                             | NA                              | NA                             | NA                                    | NA                                     | NA                                    |
| M13.02  | Tula        | 58  | NA                                                     | NA                             | NA                              | NA                             | NA                                    | NA                                     | NA                                    |
| M13.02  | Tula        | 60  | NA                                                     | NA                             | NA                              | NA                             | NA                                    | NA                                     | NA                                    |
| M13.02  | Tula        | 64  | NA                                                     | NA                             | NA                              | NA                             | NA                                    | NA                                     | NA                                    |
| M13.02  | Tula        | 66  | NA                                                     | NA                             | NA                              | NA                             | NA                                    | NA                                     | NA                                    |
| M13.02  | Tula        | 70  | NA                                                     | NA                             | NA                              | NA                             | NA                                    | NA                                     | NA                                    |
| M13.02  | Tula        | 71  | NA                                                     | NA                             | NA                              | NA                             | NA                                    | NA                                     | NA                                    |
| M13.02  | Tula        | 77  | NA                                                     | NA                             | NA                              | NA                             | NA                                    | NA                                     | NA                                    |
| M13.02  | Tula        | 83  | NA                                                     | NA                             | NA                              | NA                             | NA                                    | NA                                     | NA                                    |
| M13.02  | Tula        | 84  | NA                                                     | NA                             | NA                              | NA                             | NA                                    | NA                                     | NA                                    |
| M13.02  | Tula        | 85  | NA                                                     | NA                             | NA                              | NA                             | NA                                    | NA                                     | NA                                    |
| M13.02  | Tula        | 88  | NA                                                     | NA                             | NA                              | NA                             | NA                                    | NA                                     | NA                                    |
| M13.02  | Tula        | 89  | NA                                                     | NA                             | NA                              | NA                             | NA                                    | NA                                     | NA                                    |
| M13.02  | Tula        | 90  | NA                                                     | NA                             | NA                              | NA                             | NA                                    | NA                                     | NA                                    |
| M14.01  | Guadalajara | 30  | 0.062039726                                            | 232071.5909                    | 241182.4004                     | 250293.2059                    | 14397.65785                           | 14962.88998                            | 15528.12185                           |
| M14.01  | Guadalajara | 31  | 0.040306987                                            | 230160.9258                    | 239303.3578                     | 248445.7856                    | 9277.093411                           | 9645.597298                            | 10014.10101                           |
| M14.01  | Guadalajara | 32  | 0.018730317                                            | 227745.1831                    | 236575.7144                     | 245406.2413                    | 4265.739487                           | 4431.138137                            | 4596.536706                           |
| M14.01  | Guadalajara | 33  | 0.044536466                                            | 225296.19                      | 233803.795                      | 242311.3955                    | 10033.89606                           | 10412.79472                            | 10791.69317                           |

| City ID | City name   | Age | Avoidable deaths from respiratory causes mean estimate | Lower value, lost productivity | Center value, lost productivity | Upper value, lost productivity | Lost productivity by age, lower value | Lost productivity by age, center value | Lost productivity by age, upper value |
|---------|-------------|-----|--------------------------------------------------------|--------------------------------|---------------------------------|--------------------------------|---------------------------------------|----------------------------------------|---------------------------------------|
| M14.01  | Guadalajara | 34  | 0.049158183                                            | 222694.3101                    | 231214.8192                     | 239735.325                     | 10947.24771                           | 11366.10046                            | 11784.95304                           |
| M14.01  | Guadalajara | 35  | 0.126533566                                            | 220161.5628                    | 228702.1004                     | 237242.6332                    | 27857.82756                           | 28938.49224                            | 30019.15631                           |
| M14.01  | Guadalajara | 36  | 0.134229058                                            | 217612.7091                    | 226161.7462                     | 234710.7783                    | 29209.94896                           | 30357.47815                            | 31505.00668                           |
| M14.01  | Guadalajara | 37  | 0.119050814                                            | 214268.0616                    | 222699.8525                     | 231131.6397                    | 25508.78706                           | 26512.59863                            | 27516.40975                           |
| M14.01  | Guadalajara | 38  | 0.114836016                                            | 211304.7443                    | 219716.5479                     | 228128.3477                    | 24265.3951                            | 25231.37312                            | 26197.3507                            |
| M14.01  | Guadalajara | 39  | 0.058645065                                            | 208348.0458                    | 216738.7913                     | 225129.5328                    | 12218.58476                           | 12710.66058                            | 13202.73616                           |
| M14.01  | Guadalajara | 40  | 0.209329824                                            | 214350.5662                    | 223036.6194                     | 231722.6696                    | 44869.9664                            | 46688.21638                            | 48506.46577                           |
| M14.01  | Guadalajara | 41  | 0.125170074                                            | 211061.7145                    | 219713.8067                     | 228365.8958                    | 26418.61044                           | 27501.59346                            | 28584.5761                            |
| M14.01  | Guadalajara | 42  | 0.14308655                                             | 207239.5021                    | 215894.8232                     | 224550.1425                    | 29653.18545                           | 30891.64549                            | 32130.10527                           |
| M14.01  | Guadalajara | 43  | 0.170457682                                            | 203683.0158                    | 212376.4925                     | 221069.966                     | 34719.33479                           | 36201.20467                            | 37683.07403                           |
| M14.01  | Guadalajara | 44  | 0.092060672                                            | 199734.6379                    | 208434.5195                     | 217134.3979                    | 18387.7049                            | 19188.62185                            | 19989.53849                           |
| M14.01  | Guadalajara | 45  | 0.106439757                                            | 195463.4635                    | 203987.7985                     | 212512.1289                    | 20805.08357                           | 21712.41171                            | 22619.73937                           |
| M14.01  | Guadalajara | 46  | 0.309920807                                            | 191153.0278                    | 199635.5422                     | 208118.0506                    | 59242.30064                           | 61871.20834                            | 64500.1142                            |
| M14.01  | Guadalajara | 47  | 0.06449384                                             | 186839.0174                    | 195292.6692                     | 203746.315                     | 12049.96568                           | 12595.17415                            | 13140.38222                           |
| M14.01  | Guadalajara | 48  | 0.237006238                                            | 182722.6746                    | 191113.0286                     | 199503.3776                    | 43306.4138                            | 45294.98004                            | 47283.54508                           |
| M14.01  | Guadalajara | 49  | 0.250476583                                            | 178080.6446                    | 186408.6565                     | 194736.6644                    | 44605.03129                           | 46691.00325                            | 48776.97421                           |
| M14.01  | Guadalajara | 50  | 0.202138536                                            | 173446.8148                    | 181692.4338                     | 189938.0488                    | 35060.28523                           | 36727.04259                            | 38393.79913                           |
| M14.01  | Guadalajara | 51  | 0.289822046                                            | 168578.0411                    | 176738.2352                     | 184898.4251                    | 48857.63272                           | 51222.63686                            | 53587.63979                           |
| M14.01  | Guadalajara | 52  | 0.325648702                                            | 163534.1234                    | 171633.5233                     | 179732.9188                    | 53254.67505                           | 55892.2341                             | 58529.79173                           |
| M14.01  | Guadalajara | 53  | 0.279351553                                            | 158470.7452                    | 166462.9879                     | 174455.2262                    | 44269.04885                           | 46501.69428                            | 48734.33845                           |
| M14.01  | Guadalajara | 54  | 0.463922788                                            | 152769.6835                    | 160652.8729                     | 168536.0577                    | 70873.33749                           | 74530.52869                            | 78187.71776                           |
| M14.01  | Guadalajara | 55  | 0.369185533                                            | 147245.619                     | 155025.7289                     | 162805.8353                    | 54360.95231                           | 57233.25634                            | 60105.55907                           |



| City ID | City name   | Age | Avoidable deaths from respiratory causes mean estimate | Lower value, lost productivity | Center value, lost productivity | Upper value, lost productivity | Lost productivity by age, lower value | Lost productivity by age, center value | Lost productivity by age, upper value |
|---------|-------------|-----|--------------------------------------------------------|--------------------------------|---------------------------------|--------------------------------|---------------------------------------|----------------------------------------|---------------------------------------|
| M14.01  | Guadalajara | 56  | 0.228172107                                            | 141614.0276                    | 149302.7559                     | 156991.4794                    | 32312.37105                           | 34066.72439                            | 35821.07663                           |
| M14.01  | Guadalajara | 57  | 0.526012913                                            | 135918.1645                    | 143491.486                      | 151064.8026                    | 71494.7097                            | 75478.37463                            | 79462.03693                           |
| M14.01  | Guadalajara | 58  | 0.436047452                                            | 129789.2859                    | 137147.0798                     | 144504.8685                    | 56594.28746                           | 59802.63471                            | 63010.97973                           |
| M14.01  | Guadalajara | 59  | 0.336526115                                            | 123579.0241                    | 130765.1704                     | 137951.3127                    | 41587.56881                           | 44005.89472                            | 46424.21927                           |
| M14.01  | Guadalajara | 60  | 0.627179546                                            | 117057.7586                    | 124031.4731                     | 131005.1847                    | 73416.23187                           | 77790.00296                            | 82163.77221                           |
| M14.01  | Guadalajara | 61  | 0.565999015                                            | 111346.7571                    | 118128.1243                     | 124909.4884                    | 63022.1548                            | 66860.40194                            | 70698.64737                           |
| M14.01  | Guadalajara | 62  | 0.593214289                                            | 105477.4878                    | 112005.2027                     | 118532.9144                    | 62570.75291                           | 66443.08661                            | 70315.41846                           |
| M14.01  | Guadalajara | 63  | 0.530177311                                            | 99151.21565                    | 105492.0231                     | 111832.8273                    | 52567.72489                           | 55929.47713                            | 59291.22767                           |
| M14.01  | Guadalajara | 64  | 0.810449776                                            | 92435.56824                    | 98533.24418                     | 104630.9181                    | 74914.38557                           | 79856.24568                            | 84798.1041                            |
| M14.01  | Guadalajara | 65  | 0.881972682                                            | 85856.3259                     | 91668.38178                     | 97480.43552                    | 75722.93401                           | 80849.00852                            | 85975.08115                           |
| M14.01  | Guadalajara | 66  | 0.703211071                                            | 79472.51555                    | 84982.89609                     | 90493.27444                    | 55885.95277                           | 59760.91338                            | 63635.87244                           |
| M14.01  | Guadalajara | 67  | 0.770298858                                            | 73072.47255                    | 78265.54499                     | 83458.61515                    | 56287.64217                           | 60287.85994                            | 64288.07596                           |
| M14.01  | Guadalajara | 68  | 0.746512957                                            | 66496.37624                    | 71253.69797                     | 76011.0186                     | 49640.40647                           | 53191.80878                            | 56743.21028                           |
| M14.01  | Guadalajara | 69  | 1.031518802                                            | 59490.90552                    | 63804.16591                     | 68117.42516                    | 61365.98759                           | 65815.19677                            | 70264.40479                           |
| M14.01  | Guadalajara | 70  | 0.940608018                                            | 51966.9483                     | 55850.58044                     | 59734.21143                    | 48880.52825                           | 52533.50379                            | 56186.47823                           |
| M14.01  | Guadalajara | 71  | 0.884912405                                            | 44681.41085                    | 48098.65592                     | 51515.89978                    | 39539.13475                           | 42563.0973                             | 45587.05879                           |
| M14.01  | Guadalajara | 72  | 0.975460794                                            | 38131.79439                    | 41072.61745                     | 44013.43927                    | 37196.07042                           | 40064.72802                            | 42933.38442                           |
| M14.01  | Guadalajara | 73  | 0.975109025                                            | 31213.35888                    | 33706.94138                     | 36200.52384                    | 30436.42795                           | 32867.94275                            | 35299.45751                           |
| M14.01  | Guadalajara | 74  | 1.309369414                                            | 24015.07386                    | 26007.33213                     | 27999.59036                    | 31444.60319                           | 34053.20522                            | 36661.80721                           |
| M14.01  | Guadalajara | 75  | 1.164567711                                            | 16839.98804                    | 18211.68872                     | 19583.39061                    | 19611.30633                           | 21208.74465                            | 22806.18438                           |
| M14.01  | Guadalajara | 76  | 1.037826334                                            | 8292.801223                    | 9006.638771                     | 9720.47632                     | 8606.487488                           | 9347.326894                            | 10088.1663                            |
| M14.01  | Guadalajara | 77  | 1.330425762                                            | 8292.801223                    | 9006.638771                     | 9720.47632                     | 11032.95639                           | 11982.66425                            | 12932.37211                           |

| City ID | City name   | Age | Avoidable deaths from respiratory causes mean estimate | Lower value, lost productivity | Center value, lost productivity | Upper value, lost productivity | Lost productivity by age, lower value | Lost productivity by age, center value | Lost productivity by age, upper value |
|---------|-------------|-----|--------------------------------------------------------|--------------------------------|---------------------------------|--------------------------------|---------------------------------------|----------------------------------------|---------------------------------------|
| M14.01  | Guadalajara | 78  | 1.628103071                                            | 8292.801223                    | 9006.638771                     | 9720.47632                     | 13501.53514                           | 14663.73624                            | 15825.93735                           |
| M14.01  | Guadalajara | 79  | 1.550520102                                            | 8292.801223                    | 9006.638771                     | 9720.47632                     | 12858.155                             | 13964.97446                            | 15071.79393                           |
| M14.01  | Guadalajara | 80  | 1.532735014                                            | 8292.801223                    | 9006.638771                     | 9720.47632                     | 12710.6668                            | 13804.79061                            | 14898.91441                           |
| M14.01  | Guadalajara | 81  | 1.259372406                                            | 8292.801223                    | 9006.638771                     | 9720.47632                     | 10443.72503                           | 11342.71234                            | 12241.69965                           |
| M14.01  | Guadalajara | 82  | 1.193477057                                            | 8292.801223                    | 9006.638771                     | 9720.47632                     | 9897.267994                           | 10749.21673                            | 11601.16547                           |
| M14.01  | Guadalajara | 83  | 1.527144461                                            | 8292.801223                    | 9006.638771                     | 9720.47632                     | 12664.30546                           | 13754.43852                            | 14844.57157                           |
| M14.01  | Guadalajara | 84  | 1.539004376                                            | 8292.801223                    | 9006.638771                     | 9720.47632                     | 12762.65737                           | 13861.25648                            | 14959.85559                           |
| M14.01  | Guadalajara | 85  | 1.943865449                                            | 8292.801223                    | 9006.638771                     | 9720.47632                     | 16120.08977                           | 17507.69392                            | 18895.29807                           |
| M14.01  | Guadalajara | 86  | 1.640623351                                            | 8292.801223                    | 9006.638771                     | 9720.47632                     | 13605.36333                           | 14776.50188                            | 15947.64043                           |
| M14.01  | Guadalajara | 87  | 1.446193905                                            | 8292.801223                    | 9006.638771                     | 9720.47632                     | 11992.99858                           | 13025.34609                            | 14057.69361                           |
| M14.01  | Guadalajara | 88  | 1.435980325                                            | 8292.801223                    | 9006.638771                     | 9720.47632                     | 11908.2994                            | 12933.35607                            | 13958.41275                           |
| M14.01  | Guadalajara | 89  | 1.62744398                                             | 8292.801223                    | 9006.638771                     | 9720.47632                     | 13496.06943                           | 14657.80005                            | 15819.53067                           |
| M14.01  | Guadalajara | 90  | 1.857306829                                            | 8292.801223                    | 9006.638771                     | 9720.47632                     | 15402.27634                           | 16728.09169                            | 18053.90705                           |
| M14.01  | Guadalajara | 91  | 1.566131021                                            | 8292.801223                    | 9006.638771                     | 9720.47632                     | 12987.61324                           | 14105.57637                            | 15223.5395                            |
| M14.01  | Guadalajara | 92  | 1.489714779                                            | 8292.801223                    | 9006.638771                     | 9720.47632                     | 12353.90854                           | 13417.32289                            | 14480.73723                           |
| M14.01  | Guadalajara | 93  | 1.26043474                                             | 8292.801223                    | 9006.638771                     | 9720.47632                     | 10452.53475                           | 11352.2804                             | 12252.02604                           |
| M14.01  | Guadalajara | 94  | 1.32354667                                             | 8292.801223                    | 9006.638771                     | 9720.47632                     | 10975.90944                           | 11920.70675                            | 12865.50406                           |
| M14.01  | Guadalajara | 95  | 0.742423522                                            | 8292.801223                    | 9006.638771                     | 9720.47632                     | 6156.770694                           | 6686.740481                            | 7216.710269                           |
| M14.01  | Guadalajara | 96  | 0.64779328                                             | 8292.801223                    | 9006.638771                     | 9720.47632                     | 5372.020904                           | 5834.440071                            | 6296.859237                           |
| M14.01  | Guadalajara | 97  | 0.718727266                                            | 8292.801223                    | 9006.638771                     | 9720.47632                     | 5960.262349                           | 6473.316859                            | 6986.371368                           |
| M14.01  | Guadalajara | 98  | 0.321575292                                            | 8292.801223                    | 9006.638771                     | 9720.47632                     | 2666.759977                           | 2896.312496                            | 3125.865014                           |
| M14.01  | Guadalajara | 99  | 0.280861385                                            | 8292.801223                    | 9006.638771                     | 9720.47632                     | 2329.127638                           | 2529.61704                             | 2730.106443                           |

| City ID | City name   | Age | Avoidable deaths from respiratory causes mean estimate | Lower value, lost productivity | Center value, lost productivity | Upper value, lost productivity | Lost productivity by age, lower value | Lost productivity by age, center value | Lost productivity by age, upper value |
|---------|-------------|-----|--------------------------------------------------------|--------------------------------|---------------------------------|--------------------------------|---------------------------------------|----------------------------------------|---------------------------------------|
| M14.01  | Guadalajara | 100 | 0.220185151                                            | 8292.801223                    | 9006.638771                     | 9720.47632                     | 1825.951689                           | 1983.128117                            | 2140.304545                           |
| M14.01  | Guadalajara | 101 | 0.2318827                                              | 8292.801223                    | 9006.638771                     | 9720.47632                     | 1922.957139                           | 2088.483717                            | 2254.010295                           |
| M14.01  | Guadalajara | 102 | 0.136960994                                            | 8292.801223                    | 9006.638771                     | 9720.47632                     | 1135.790298                           | 1233.558198                            | 1331.326098                           |
| M14.01  | Guadalajara | 103 | 0.162630708                                            | 8292.801223                    | 9006.638771                     | 9720.47632                     | 1348.664136                           | 1464.756042                            | 1580.847948                           |
| M14.01  | Guadalajara | 104 | 0.193809717                                            | 8292.801223                    | 9006.638771                     | 9720.47632                     | 1607.225456                           | 1745.574109                            | 1883.922763                           |
| M14.01  | Guadalajara | 105 | 0.024579092                                            | 8292.801223                    | 9006.638771                     | 9720.47632                     | 203.8295212                           | 221.3749997                            | 238.9204782                           |
| M15.02  | Toluca      | 30  | 0.026069682                                            | 191361.5579                    | 203668.4963                     | 215975.4352                    | 4988.73493                            | 5309.572897                            | 5630.410878                           |
| M15.02  | Toluca      | 32  | 0.021727082                                            | 188072.3845                    | 200454.3669                     | 212836.3512                    | 4086.264038                           | 4355.288379                            | 4624.312761                           |
| M15.02  | Toluca      | 33  | 0.020638409                                            | 185932.5314                    | 198381.6002                     | 210830.6696                    | 3837.351704                           | 4094.280681                            | 4351.209672                           |
| M15.02  | Toluca      | 36  | 0.021727082                                            | 179892.5736                    | 192437.6707                     | 204982.7673                    | 3908.540618                           | 4181.108966                            | 4453.677303                           |
| M15.02  | Toluca      | 38  | 0.020093619                                            | 175381.5316                    | 187978.9591                     | 200576.3886                    | 3524.049688                           | 3777.177598                            | 4030.305548                           |
| M15.02  | Toluca      | 39  | 0.021727082                                            | 172625.3277                    | 185268.5735                     | 197911.82                      | 3750.644574                           | 4025.345406                            | 4300.046256                           |
| M15.02  | Toluca      | 40  | 0.086908326                                            | 177499.818                     | 190542.8181                     | 203585.8191                    | 15426.21209                           | 16559.7574                             | 17693.30279                           |
| M15.02  | Toluca      | 41  | 0.042365491                                            | 174781.3334                    | 187857.1568                     | 200932.9809                    | 7404.697                              | 7958.660675                            | 8512.624387                           |
| M15.02  | Toluca      | 42  | 0.021727082                                            | 171445.343                     | 184550.174                      | 197655.0058                    | 3725.00695                            | 4009.736681                            | 4294.466432                           |
| M15.02  | Toluca      | 43  | 0.020093619                                            | 168184.9231                    | 181220.9547                     | 194256.9884                    | 3379.443778                           | 3641.384831                            | 3903.325927                           |
| M15.02  | Toluca      | 44  | 0.041820701                                            | 165062.4827                    | 178085.0706                     | 191107.6606                    | 6903.028676                           | 7447.642423                            | 7992.256263                           |
| M15.02  | Toluca      | 45  | 0.063547782                                            | 161721.0229                    | 174647.4636                     | 187573.9065                    | 10277.01234                           | 11098.45898                            | 11919.90575                           |
| M15.02  | Toluca      | 46  | 0.089617464                                            | 157908.8699                    | 170743.4774                     | 183578.0872                    | 14151.39247                           | 15301.59744                            | 16451.80263                           |
| M15.02  | Toluca      | 47  | 0.043454163                                            | 154141.1084                    | 166872.5353                     | 179603.9647                    | 6698.072866                           | 7251.30637                             | 7804.539979                           |
| M15.02  | Toluca      | 48  | 0.06259526                                             | 150420.657                     | 163132.0202                     | 175843.386                     | 9415.620173                           | 10211.29127                            | 11006.96252                           |
| M15.02  | Toluca      | 49  | 0.021727082                                            | 146303.9009                    | 158889.9746                     | 171476.0495                    | 3178.756788                           | 3452.215436                            | 3725.674114                           |

| City ID | City name | Age | Avoidable deaths from respiratory causes mean estimate | Lower value, lost productivity | Center value, lost productivity | Upper value, lost productivity | Lost productivity by age, lower value | Lost productivity by age, center value | Lost productivity by age, upper value |
|---------|-----------|-----|--------------------------------------------------------|--------------------------------|---------------------------------|--------------------------------|---------------------------------------|----------------------------------------|---------------------------------------|
| M15.02  | Toluca    | 50  | 0.125735311                                            | 141928.4209                    | 154499.2972                     | 167070.1748                    | 17845.41412                           | 19426.01716                            | 21006.62037                           |
| M15.02  | Toluca    | 51  | 0.110800664                                            | 136725.7594                    | 149286.8253                     | 161847.8926                    | 15149.30489                           | 16541.07933                            | 17932.85393                           |
| M15.02  | Toluca    | 52  | 0.02077456                                             | 131818.3279                    | 144243.5792                     | 156668.8307                    | 2738.467716                           | 2996.59684                             | 3254.725968                           |
| M15.02  | Toluca    | 53  | 0.083641401                                            | 127224.6642                    | 139477.1497                     | 151729.6342                    | 10641.24919                           | 11666.06425                            | 12690.87922                           |
| M15.02  | Toluca    | 54  | 0.089345883                                            | 122469.6917                    | 134491.6065                     | 146513.5216                    | 10942.1627                            | 12016.2713                             | 13090.37991                           |
| M15.02  | Toluca    | 55  | 0.112978008                                            | 117230.2214                    | 129131.7537                     | 141033.2873                    | 13244.4369                            | 14589.04831                            | 15933.65987                           |
| M15.02  | Toluca    | 56  | 0.167963743                                            | 112324.079                     | 124105.4414                     | 135886.8054                    | 18866.37274                           | 20845.21448                            | 22824.05647                           |
| M15.02  | Toluca    | 57  | 0.043454163                                            | 108080.2952                    | 119727.0541                     | 131373.8159                    | 4696.538776                           | 5202.638941                            | 5708.739226                           |
| M15.02  | Toluca    | 58  | 0.200009488                                            | 102513.4826                    | 113925.7576                     | 125338.0354                    | 20503.66914                           | 22786.23241                            | 25068.79626                           |
| M15.02  | Toluca    | 59  | 0.158733577                                            | 97274.2777                     | 108422.1982                     | 119570.1204                    | 15440.69409                           | 17210.24339                            | 18979.79296                           |
| M15.02  | Toluca    | 60  | 0.129409967                                            | 92196.8869                     | 103064.9688                     | 113933.0524                    | 11931.19613                           | 13337.63426                            | 14744.07261                           |
| M15.02  | Toluca    | 61  | 0.204896878                                            | 86657.77098                    | 97253.5003                      | 107849.2302                    | 17755.90675                           | 19926.93861                            | 22097.97059                           |
| M15.02  | Toluca    | 62  | 0.116368086                                            | 80893.29451                    | 91112.44925                     | 101331.6033                    | 9413.397887                           | 10602.58137                            | 11791.76477                           |
| M15.02  | Toluca    | 63  | 0.085274864                                            | 75517.89432                    | 85284.70387                     | 95051.51149                    | 6439.778149                           | 7272.641503                            | 8105.504692                           |
| M15.02  | Toluca    | 64  | 0.132119105                                            | 70027.24672                    | 79277.30982                     | 88527.37095                    | 9251.937178                           | 10474.04724                            | 11696.15704                           |
| M15.02  | Toluca    | 65  | 0.227576482                                            | 64254.13141                    | 73052.40659                     | 81850.68097                    | 14622.72916                           | 16625.00968                            | 18627.29001                           |
| M15.02  | Toluca    | 66  | 0.108635408                                            | 58896.57394                    | 67421.74895                     | 75946.92314                    | 6398.253328                           | 7324.389192                            | 8250.524966                           |
| M15.02  | Toluca    | 67  | 0.296964896                                            | 53553.08905                    | 61495.30894                     | 69437.52921                    | 15903.3875                            | 18261.948                              | 20620.50862                           |
| M15.02  | Toluca    | 68  | 0.285692992                                            | 48165.62056                    | 55290.98969                     | 62416.35797                    | 13760.58023                           | 15796.24825                            | 17831.91603                           |
| M15.02  | Toluca    | 69  | 0.245097113                                            | 42475.3649                     | 48945.97536                     | 55416.58496                    | 10410.58932                           | 11996.51727                            | 13582.445                             |
| M15.02  | Toluca    | 70  | 0.206938072                                            | 37343.93999                    | 43148.1997                      | 48952.45728                    | 7727.882957                           | 8929.005272                            | 10130.12715                           |
| M15.02  | Toluca    | 71  | 0.284196588                                            | 32315.26607                    | 37594.89915                     | 42874.5288                     | 9183.888349                           | 10684.34206                            | 12184.79479                           |

| City ID | City name | Age | Avoidable deaths from respiratory causes mean estimate | Lower value, lost productivity | Center value, lost productivity | Upper value, lost productivity | Lost productivity by age, lower value | Lost productivity by age, center value | Lost productivity by age, upper value |
|---------|-----------|-----|--------------------------------------------------------|--------------------------------|---------------------------------|--------------------------------|---------------------------------------|----------------------------------------|---------------------------------------|
| M15.02  | Toluca    | 72  | 0.419036919                                            | 26261.34827                    | 30637.23385                     | 35013.11589                    | 11004.47447                           | 12838.13208                            | 14671.78821                           |
| M15.02  | Toluca    | 73  | 0.204228935                                            | 20825.03311                    | 24331.01328                     | 27836.99105                    | 4253.074326                           | 4969.09692                             | 5685.119024                           |
| M15.02  | Toluca    | 74  | 0.305799607                                            | 15515.69744                    | 18162.2809                      | 20808.86312                    | 4744.694185                           | 5554.018369                            | 6363.342175                           |
| M15.02  | Toluca    | 75  | 0.242387976                                            | 10392.6395                     | 12177.34664                     | 13962.05374                    | 2519.050848                           | 2951.642399                            | 3384.233941                           |
| M15.02  | Toluca    | 76  | 0.215761415                                            | 4541.873134                    | 5574.77519                      | 6607.678447                    | 979.960974                            | 1202.821383                            | 1425.682051                           |
| M15.02  | Toluca    | 77  | 0.453792885                                            | 4541.873134                    | 5574.77519                      | 6607.678447                    | 2061.069712                           | 2529.793316                            | 2998.517465                           |
| M15.02  | Toluca    | 78  | 0.318282618                                            | 4541.873134                    | 5574.77519                      | 6607.678447                    | 1445.599271                           | 1774.354042                            | 2103.109195                           |
| M15.02  | Toluca    | 79  | 0.510696486                                            | 4541.873134                    | 5574.77519                      | 6607.678447                    | 2319.518648                           | 2847.018098                            | 3374.518162                           |
| M15.02  | Toluca    | 80  | 0.325335439                                            | 4541.873134                    | 5574.77519                      | 6607.678447                    | 1477.632291                           | 1813.671936                            | 2149.711971                           |
| M15.02  | Toluca    | 81  | 0.393796606                                            | 4541.873134                    | 5574.77519                      | 6607.678447                    | 1788.574224                           | 2195.327548                            | 2602.081345                           |
| M15.02  | Toluca    | 82  | 0.440504697                                            | 4541.873134                    | 5574.77519                      | 6607.678447                    | 2000.716449                           | 2455.714657                            | 2910.713393                           |
| M15.02  | Toluca    | 83  | 0.376127546                                            | 4541.873134                    | 5574.77519                      | 6607.678447                    | 1708.323598                           | 2096.826514                            | 2485.329882                           |
| M15.02  | Toluca    | 84  | 0.407628501                                            | 4541.873134                    | 5574.77519                      | 6607.678447                    | 1851.396936                           | 2272.437252                            | 2693.478058                           |
| M15.02  | Toluca    | 85  | 0.3400097                                              | 4541.873134                    | 5574.77519                      | 6607.678447                    | 1544.280919                           | 1895.477637                            | 2246.674763                           |
| M15.02  | Toluca    | 86  | 0.341767224                                            | 4541.873134                    | 5574.77519                      | 6607.678447                    | 1552.263372                           | 1905.27544                             | 2258.287919                           |
| M15.02  | Toluca    | 87  | 0.356033927                                            | 4541.873134                    | 5574.77519                      | 6607.678447                    | 1617.060929                           | 1984.809105                            | 2352.557708                           |
| M15.02  | Toluca    | 88  | 0.250515389                                            | 4541.873134                    | 5574.77519                      | 6607.678447                    | 1137.809114                           | 1396.566975                            | 1655.325136                           |
| M15.02  | Toluca    | 89  | 0.506490036                                            | 4541.873134                    | 5574.77519                      | 6607.678447                    | 2300.413486                           | 2823.568085                            | 3346.723293                           |
| M15.02  | Toluca    | 90  | 0.330100396                                            | 4541.873134                    | 5574.77519                      | 6607.678447                    | 1499.274119                           | 1840.235496                            | 2181.19727                            |
| M15.02  | Toluca    | 91  | 0.463307454                                            | 4541.873134                    | 5574.77519                      | 6607.678447                    | 2104.283678                           | 2582.8349                              | 3061.386678                           |
| M15.02  | Toluca    | 92  | 0.397186684                                            | 4541.873134                    | 5574.77519                      | 6607.678447                    | 1803.97153                            | 2214.226473                            | 2624.481893                           |
| M15.02  | Toluca    | 93  | 0.248351041                                            | 4541.873134                    | 5574.77519                      | 6607.678447                    | 1127.978923                           | 1384.501224                            | 1641.023824                           |

| City ID | City name | Age | Avoidable deaths from respiratory causes mean estimate | Lower value, lost productivity | Center value, lost productivity | Upper value, lost productivity | Lost productivity by age, lower value | Lost productivity by age, center value | Lost productivity by age, upper value |
|---------|-----------|-----|--------------------------------------------------------|--------------------------------|---------------------------------|--------------------------------|---------------------------------------|----------------------------------------|---------------------------------------|
| M15.02  | Toluca    | 94  | 0.202595472                                            | 4541.873134                    | 5574.77519                      | 6607.678447                    | 920.1629318                           | 1129.424211                            | 1338.685735                           |
| M15.02  | Toluca    | 95  | 0.233008838                                            | 4541.873134                    | 5574.77519                      | 6607.678447                    | 1058.296579                           | 1298.971887                            | 1539.647474                           |
| M15.02  | Toluca    | 96  | 0.021727082                                            | 4541.873134                    | 5574.77519                      | 6607.678447                    | 98.68164801                           | 121.1235952                            | 143.5655685                           |
| M15.02  | Toluca    | 97  | 0.111889336                                            | 4541.873134                    | 5574.77519                      | 6607.678447                    | 508.1871687                           | 623.7578939                            | 739.3287534                           |
| M15.02  | Toluca    | 98  | 0.112978008                                            | 4541.873134                    | 5574.77519                      | 6607.678447                    | 513.1317796                           | 629.8269964                            | 746.522349                            |
| M15.02  | Toluca    | 99  | 0.043454163                                            | 4541.873134                    | 5574.77519                      | 6607.678447                    | 197.363296                            | 242.2471905                            | 287.1311371                           |
| M15.02  | Toluca    | 100 | 0.046708091                                            | 4541.873134                    | 5574.77519                      | 6607.678447                    | 212.1422247                           | 260.3871082                            | 308.6320477                           |
| M15.02  | Toluca    | 101 | 0.021727082                                            | 4541.873134                    | 5574.77519                      | 6607.678447                    | 98.68164801                           | 121.1235952                            | 143.5655685                           |
| M15.02  | Toluca    | 102 | 0.043454163                                            | 4541.873134                    | 5574.77519                      | 6607.678447                    | 197.363296                            | 242.2471905                            | 287.1311371                           |
| M16.02  | Morelia   | 32  | 0.049700555                                            | 225179.1627                    | 238395.5244                     | 251611.8882                    | 11191.52941                           | 11848.38993                            | 12505.25055                           |
| M16.02  | Morelia   | 34  | 0.074550833                                            | 221494.0868                    | 234435.4614                     | 247376.8395                    | 16512.56864                           | 17477.3589                             | 18442.14941                           |
| M16.02  | Morelia   | 37  | 0.024850278                                            | 213433.8173                    | 226274.6296                     | 239115.4444                    | 5303.889614                           | 5622.987363                            | 5942.085177                           |
| M16.02  | Morelia   | 40  | 0.074550833                                            | 212585.4553                    | 225809.1369                     | 239032.824                     | 15848.42274                           | 16834.25922                            | 17820.09611                           |
| M16.02  | Morelia   | 41  | 0.049700555                                            | 209458.4407                    | 222744.2236                     | 236030.0108                    | 10410.2008                            | 11070.51159                            | 11730.82259                           |
| M16.02  | Morelia   | 42  | 0.024850278                                            | 205949.7472                    | 219265.9509                     | 232582.1591                    | 5117.908392                           | 5448.819753                            | 5779.731224                           |
| M16.02  | Morelia   | 43  | 0.049700555                                            | 202483.9553                    | 215819.3516                     | 229154.7537                    | 10063.565                             | 10726.3416                             | 11389.1185                            |
| M16.02  | Morelia   | 46  | 0.024850278                                            | 191437.5176                    | 204430.0997                     | 217422.6882                    | 4757.275459                           | 5080.144731                            | 5403.014161                           |
| M16.02  | Morelia   | 47  | 0.024850278                                            | 187188.336                     | 200097.3363                     | 213006.3432                    | 4651.682115                           | 4972.474357                            | 5293.266763                           |
| M16.02  | Morelia   | 48  | 0.024850278                                            | 182256.4648                    | 195134.8215                     | 208013.1838                    | 4529.123748                           | 4849.154487                            | 5169.185364                           |
| M16.02  | Morelia   | 50  | 0.049700555                                            | 173473.6899                    | 186173.0477                     | 198872.4114                    | 8621.738709                           | 9252.903842                            | 9884.069267                           |
| M16.02  | Morelia   | 51  | 0.049700555                                            | 168458.3578                    | 181084.8485                     | 193711.3452                    | 8372.473919                           | 9000.017514                            | 9627.56141                            |
| M16.02  | Morelia   | 52  | 0.049700555                                            | 163243.1832                    | 175728.5926                     | 188214.007                     | 8113.276845                           | 8733.808623                            | 9354.34065                            |

| City ID | City name | Age | Avoidable deaths from respiratory causes mean estimate | Lower value, lost productivity | Center value, lost productivity | Upper value, lost productivity | Lost productivity by age, lower value | Lost productivity by age, center value | Lost productivity by age, upper value |
|---------|-----------|-----|--------------------------------------------------------|--------------------------------|---------------------------------|--------------------------------|---------------------------------------|----------------------------------------|---------------------------------------|
| M16.02  | Morelia   | 56  | 0.024850278                                            | 139901.6304                    | 151835.7704                     | 163769.9148                    | 3476.594355                           | 3773.161047                            | 4069.727847                           |
| M16.02  | Morelia   | 58  | 0.09940111                                             | 126477.3376                    | 138138.4396                     | 149799.5449                    | 12571.9878                            | 13731.11429                            | 14890.24111                           |
| M16.02  | Morelia   | 59  | 0.049700555                                            | 119482.332                     | 130937.7647                     | 142393.201                     | 5938.338239                           | 6507.679609                            | 7077.021152                           |
| M16.02  | Morelia   | 61  | 0.024850278                                            | 106174.8689                    | 117031.7286                     | 127888.592                     | 2638.474968                           | 2908.270946                            | 3178.067015                           |
| M16.02  | Morelia   | 62  | 0.09940111                                             | 99782.96202                    | 110274.9573                     | 120766.9577                    | 9918.53723                            | 10961.45322                            | 12004.3697                            |
| M16.02  | Morelia   | 63  | 0.049700555                                            | 94244.94225                    | 104330.1849                     | 114415.4316                    | 4684.025958                           | 5185.268119                            | 5686.510477                           |
| M16.02  | Morelia   | 64  | 0.074550833                                            | 87524.16524                    | 97246.77524                     | 106969.3893                    | 6524.999413                           | 7249.828086                            | 7974.657063                           |
| M16.02  | Morelia   | 65  | 0.024850278                                            | 80577.68218                    | 89856.16988                     | 99134.66177                    | 2002.377772                           | 2232.950767                            | 2463.523867                           |
| M16.02  | Morelia   | 66  | 0.124251388                                            | 74324.84428                    | 83179.98972                     | 92035.13949                    | 9234.965072                           | 10335.22918                            | 11435.49383                           |
| M16.02  | Morelia   | 67  | 0.049700555                                            | 67558.97836                    | 75982.89634                     | 84406.81877                    | 3357.718736                           | 3776.392136                            | 4195.065758                           |
| M16.02  | Morelia   | 69  | 0.09940111                                             | 54911.41923                    | 62470.43984                     | 70029.46515                    | 5458.256049                           | 6209.631092                            | 6961.006602                           |
| M16.02  | Morelia   | 70  | 0.124251388                                            | 46781.28093                    | 53779.91996                     | 60778.56258                    | 5812.639092                           | 6682.229706                            | 7551.820766                           |
| M16.02  | Morelia   | 71  | 0.173951943                                            | 39714.59321                    | 45810.72123                     | 51906.85171                    | 6908.430667                           | 7968.863983                            | 9029.297727                           |
| M16.02  | Morelia   | 72  | 0.09940111                                             | 32384.68682                    | 36848.71653                     | 41312.74754                    | 3219.073832                           | 3662.803342                            | 4106.532982                           |
| M16.02  | Morelia   | 73  | 0.09940111                                             | 25105.8824                     | 28778.89798                     | 32451.91367                    | 2495.55259                            | 2860.654418                            | 3225.756256                           |
| M16.02  | Morelia   | 74  | 0.09940111                                             | 19092.81096                    | 21864.24882                     | 24635.68555                    | 1897.846611                           | 2173.330612                            | 2448.814501                           |
| M16.02  | Morelia   | 75  | 0.124251388                                            | 13019.65346                    | 14976.87135                     | 16934.08806                    | 1617.710015                           | 1860.897054                            | 2104.083948                           |
| M16.02  | Morelia   | 76  | 0.149101666                                            | 6350.198347                    | 7419.918956                     | 8489.638365                    | 946.825151                            | 1106.322276                            | 1265.819221                           |
| M16.02  | Morelia   | 77  | 0.149101666                                            | 6350.198347                    | 7419.918956                     | 8489.638365                    | 946.825151                            | 1106.322276                            | 1265.819221                           |
| M16.02  | Morelia   | 78  | 0.223652499                                            | 6350.198347                    | 7419.918956                     | 8489.638365                    | 1420.237727                           | 1659.483414                            | 1898.728832                           |
| M16.02  | Morelia   | 79  | 0.223652499                                            | 6350.198347                    | 7419.918956                     | 8489.638365                    | 1420.237727                           | 1659.483414                            | 1898.728832                           |
| M16.02  | Morelia   | 80  | 0.298203331                                            | 6350.198347                    | 7419.918956                     | 8489.638365                    | 1893.650302                           | 2212.644552                            | 2531.638443                           |

| City ID | City name | Age | Avoidable deaths from respiratory causes mean estimate | Lower value, lost productivity | Center value, lost productivity | Upper value, lost productivity | Lost productivity by age, lower value | Lost productivity by age, center value | Lost productivity by age, upper value |
|---------|-----------|-----|--------------------------------------------------------|--------------------------------|---------------------------------|--------------------------------|---------------------------------------|----------------------------------------|---------------------------------------|
| M16.02  | Morelia   | 81  | 0.198802221                                            | 6350.198347                    | 7419.918956                     | 8489.638365                    | 1262.433535                           | 1475.096368                            | 1687.758962                           |
| M16.02  | Morelia   | 82  | 0.198802221                                            | 6350.198347                    | 7419.918956                     | 8489.638365                    | 1262.433535                           | 1475.096368                            | 1687.758962                           |
| M16.02  | Morelia   | 83  | 0.372754164                                            | 6350.198347                    | 7419.918956                     | 8489.638365                    | 2367.062878                           | 2765.805689                            | 3164.548054                           |
| M16.02  | Morelia   | 84  | 0.273353054                                            | 6350.198347                    | 7419.918956                     | 8489.638365                    | 1735.84611                            | 2028.257506                            | 2320.668573                           |
| M16.02  | Morelia   | 85  | 0.347903887                                            | 6350.198347                    | 7419.918956                     | 8489.638365                    | 2209.258686                           | 2581.418643                            | 2953.578183                           |
| M16.02  | Morelia   | 86  | 0.198802221                                            | 6350.198347                    | 7419.918956                     | 8489.638365                    | 1262.433535                           | 1475.096368                            | 1687.758962                           |
| M16.02  | Morelia   | 87  | 0.273353054                                            | 6350.198347                    | 7419.918956                     | 8489.638365                    | 1735.84611                            | 2028.257506                            | 2320.668573                           |
| M16.02  | Morelia   | 88  | 0.323053609                                            | 6350.198347                    | 7419.918956                     | 8489.638365                    | 2051.454494                           | 2397.031598                            | 2742.608313                           |
| M16.02  | Morelia   | 89  | 0.323053609                                            | 6350.198347                    | 7419.918956                     | 8489.638365                    | 2051.454494                           | 2397.031598                            | 2742.608313                           |
| M16.02  | Morelia   | 90  | 0.223652499                                            | 6350.198347                    | 7419.918956                     | 8489.638365                    | 1420.237727                           | 1659.483414                            | 1898.728832                           |
| M16.02  | Morelia   | 91  | 0.198802221                                            | 6350.198347                    | 7419.918956                     | 8489.638365                    | 1262.433535                           | 1475.096368                            | 1687.758962                           |
| M16.02  | Morelia   | 92  | 0.273353054                                            | 6350.198347                    | 7419.918956                     | 8489.638365                    | 1735.84611                            | 2028.257506                            | 2320.668573                           |
| M16.02  | Morelia   | 93  | 0.273353054                                            | 6350.198347                    | 7419.918956                     | 8489.638365                    | 1735.84611                            | 2028.257506                            | 2320.668573                           |
| M16.02  | Morelia   | 94  | 0.173951943                                            | 6350.198347                    | 7419.918956                     | 8489.638365                    | 1104.629343                           | 1290.709322                            | 1476.789092                           |
| M16.02  | Morelia   | 95  | 0.124251388                                            | 6350.198347                    | 7419.918956                     | 8489.638365                    | 789.0209592                           | 921.9352298                            | 1054.849351                           |
| M16.02  | Morelia   | 96  | 0.074550833                                            | 6350.198347                    | 7419.918956                     | 8489.638365                    | 473.4125755                           | 553.1611379                            | 632.9096107                           |
| M16.02  | Morelia   | 98  | 0.124251388                                            | 6350.198347                    | 7419.918956                     | 8489.638365                    | 789.0209592                           | 921.9352298                            | 1054.849351                           |
| M16.02  | Morelia   | 99  | 0.024850278                                            | 6350.198347                    | 7419.918956                     | 8489.638365                    | 157.8041918                           | 184.387046                             | 210.9698702                           |
| M16.02  | Morelia   | 101 | 0.024850278                                            | 6350.198347                    | 7419.918956                     | 8489.638365                    | 157.8041918                           | 184.387046                             | 210.9698702                           |
| M16.02  | Morelia   | 102 | 0.024850278                                            | 6350.198347                    | 7419.918956                     | 8489.638365                    | 157.8041918                           | 184.387046                             | 210.9698702                           |
| M16.02  | Morelia   | 103 | 0.024850278                                            | 6350.198347                    | 7419.918956                     | 8489.638365                    | 157.8041918                           | 184.387046                             | 210.9698702                           |
| M16.02  | Morelia   | 105 | 0.024850278                                            | 6350.198347                    | 7419.918956                     | 8489.638365                    | 157.8041918                           | 184.387046                             | 210.9698702                           |



| City ID | City name | Age | Avoidable deaths from respiratory causes mean estimate | Lower value, lost productivity | Center value, lost productivity | Upper value, lost productivity | Lost productivity by age, lower value | Lost productivity by age, center value | Lost productivity by age, upper value |
|---------|-----------|-----|--------------------------------------------------------|--------------------------------|---------------------------------|--------------------------------|---------------------------------------|----------------------------------------|---------------------------------------|
| M16.02  | Morelia   | 107 | 0.024850278                                            | 6350.198347                    | 7419.918956                     | 8489.638365                    | 157.8041918                           | 184.387046                             | 210.9698702                           |
| M18.01  | Tepic     | 35  | 0.017365118                                            | 210837.8558                    | 222212.7391                     | 233587.6207                    | 3661.224314                           | 3858.750508                            | 4056.276673                           |
| M18.01  | Tepic     | 39  | 0.017365118                                            | 198372.5738                    | 209784.2925                     | 221196.0106                    | 3444.763217                           | 3642.929062                            | 3841.094897                           |
| M18.01  | Tepic     | 44  | 0.017365118                                            | 191132.6184                    | 202956.5469                     | 214780.472                     | 3319.040534                           | 3524.364451                            | 3729.68831                            |
| M18.01  | Tepic     | 45  | 0.017365118                                            | 187393.1107                    | 199239.6846                     | 211086.2539                    | 3254.103541                           | 3459.820699                            | 3665.537775                           |
| M18.01  | Tepic     | 48  | 0.017365118                                            | 175305.7916                    | 187094.4149                     | 198883.0305                    | 3044.205813                           | 3248.916652                            | 3453.627357                           |
| M18.01  | Tepic     | 50  | 0.017365118                                            | 166303.9193                    | 178035.8838                     | 189767.8414                    | 2887.887236                           | 3091.614188                            | 3295.34102                            |
| M18.01  | Tepic     | 51  | 0.017365118                                            | 161007.0269                    | 172712.7619                     | 184418.4898                    | 2795.906073                           | 2999.177547                            | 3202.448897                           |
| M18.01  | Tepic     | 54  | 0.017365118                                            | 144735.3516                    | 156265.3783                     | 167795.3997                    | 2513.346506                           | 2713.566783                            | 2913.78697                            |
| M18.01  | Tepic     | 55  | 0.034730237                                            | 138435.0751                    | 149830.2136                     | 161225.3479                    | 4807.882918                           | 5203.638774                            | 5599.394487                           |
| M18.01  | Tepic     | 56  | 0.034730237                                            | 132657.6504                    | 143949.3937                     | 155241.1328                    | 4607.231591                           | 4999.39651                             | 5391.56128                            |
| M18.01  | Tepic     | 57  | 0.017365118                                            | 126745.301                     | 137993.3967                     | 149241.4881                    | 2200.947149                           | 2396.271662                            | 2591.596099                           |
| M18.01  | Tepic     | 59  | 0.017365118                                            | 114264.2274                    | 125102.184                      | 135940.1371                    | 1984.21183                            | 2172.414228                            | 2360.616566                           |
| M18.01  | Tepic     | 60  | 0.052095355                                            | 108757.7128                    | 119396.8776                     | 130036.039                     | 5665.771652                           | 6220.022722                            | 6774.273609                           |
| M18.01  | Tepic     | 61  | 0.034730237                                            | 102777.4898                    | 113249.5465                     | 123721.5983                    | 3569.486541                           | 3933.18355                             | 4296.880389                           |
| M18.01  | Tepic     | 63  | 0.017365118                                            | 90103.18651                    | 100019.8916                     | 109936.5928                    | 1564.652495                           | 1736.857252                            | 1909.061941                           |
| M18.01  | Tepic     | 65  | 0.069460473                                            | 78009.41068                    | 87175.0406                      | 96340.66763                    | 5418.570587                           | 6055.21958                             | 6691.868372                           |
| M18.01  | Tepic     | 66  | 0.052095355                                            | 70762.74171                    | 79593.64439                     | 88424.54408                    | 3686.410148                           | 4146.459158                            | 4606.508012                           |
| M18.01  | Tepic     | 67  | 0.017365118                                            | 63773.34544                    | 72238.80259                     | 80704.25791                    | 1107.431689                           | 1254.435355                            | 1401.438988                           |
| M18.01  | Tepic     | 68  | 0.017365118                                            | 57508.14101                    | 65556.19136                     | 73604.23982                    | 998.6356733                           | 1138.39102                             | 1278.146334                           |
| M18.01  | Tepic     | 69  | 0.086825592                                            | 51670.26718                    | 59228.89594                     | 66787.52153                    | 4486.301517                           | 5142.583931                            | 5798.86607                            |
| M18.01  | Tepic     | 70  | 0.034730237                                            | 45920.52348                    | 53019.00944                     | 60117.49213                    | 1594.830647                           | 1841.362745                            | 2087.894728                           |

| City ID | City name | Age | Avoidable deaths from respiratory causes mean estimate | Lower value, lost productivity | Center value, lost productivity | Upper value, lost productivity | Lost productivity by age, lower value | Lost productivity by age, center value | Lost productivity by age, upper value |
|---------|-----------|-----|--------------------------------------------------------|--------------------------------|---------------------------------|--------------------------------|---------------------------------------|----------------------------------------|---------------------------------------|
| M18.01  | Tepic     | 71  | 0.069460473                                            | 38791.88831                    | 44571.78363                     | 50351.67558                    | 2694.502922                           | 3095.977186                            | 3497.451217                           |
| M18.01  | Tepic     | 72  | 0.052095355                                            | 32253.53073                    | 35470.9453                      | 38688.35764                    | 1680.259132                           | 1847.871487                            | 2015.483725                           |
| M18.01  | Tepic     | 73  | 0.034730237                                            | 25920.12106                    | 28441.42909                     | 30962.73604                    | 900.2119385                           | 987.7775628                            | 1075.34315                            |
| M18.01  | Tepic     | 74  | 0.052095355                                            | 18621.82523                    | 20557.01478                     | 22492.202                      | 970.1105957                           | 1070.924982                            | 1171.739247                           |
| M18.01  | Tepic     | 75  | 0.069460473                                            | 11837.02678                    | 13187.51359                     | 14537.99923                    | 822.2054827                           | 916.0109356                            | 1009.816307                           |
| M18.01  | Tepic     | 76  | 0.069460473                                            | 5939.134888                    | 6617.724565                     | 7296.313041                    | 412.5351203                           | 459.6702804                            | 506.8053572                           |
| M18.01  | Tepic     | 77  | 0.156286065                                            | 5939.134888                    | 6617.724565                     | 7296.313041                    | 928.2040207                           | 1034.258131                            | 1140.312054                           |
| M18.01  | Tepic     | 78  | 0.069460473                                            | 5939.134888                    | 6617.724565                     | 7296.313041                    | 412.5351203                           | 459.6702804                            | 506.8053572                           |
| M18.01  | Tepic     | 79  | 0.086825592                                            | 5939.134888                    | 6617.724565                     | 7296.313041                    | 515.6689004                           | 574.5878506                            | 633.5066965                           |
| M18.01  | Tepic     | 80  | 0.10419071                                             | 5939.134888                    | 6617.724565                     | 7296.313041                    | 618.8026805                           | 689.5054207                            | 760.2080357                           |
| M18.01  | Tepic     | 81  | 0.156286065                                            | 5939.134888                    | 6617.724565                     | 7296.313041                    | 928.2040207                           | 1034.258131                            | 1140.312054                           |
| M18.01  | Tepic     | 82  | 0.069460473                                            | 5939.134888                    | 6617.724565                     | 7296.313041                    | 412.5351203                           | 459.6702804                            | 506.8053572                           |
| M18.01  | Tepic     | 83  | 0.173651183                                            | 5939.134888                    | 6617.724565                     | 7296.313041                    | 1031.337801                           | 1149.175701                            | 1267.013393                           |
| M18.01  | Tepic     | 84  | 0.121555828                                            | 5939.134888                    | 6617.724565                     | 7296.313041                    | 721.9364605                           | 804.4229908                            | 886.909375                            |
| M18.01  | Tepic     | 85  | 0.121555828                                            | 5939.134888                    | 6617.724565                     | 7296.313041                    | 721.9364605                           | 804.4229908                            | 886.909375                            |
| M18.01  | Tepic     | 86  | 0.086825592                                            | 5939.134888                    | 6617.724565                     | 7296.313041                    | 515.6689004                           | 574.5878506                            | 633.5066965                           |
| M18.01  | Tepic     | 87  | 0.156286065                                            | 5939.134888                    | 6617.724565                     | 7296.313041                    | 928.2040207                           | 1034.258131                            | 1140.312054                           |
| M18.01  | Tepic     | 88  | 0.086825592                                            | 5939.134888                    | 6617.724565                     | 7296.313041                    | 515.6689004                           | 574.5878506                            | 633.5066965                           |
| M18.01  | Tepic     | 89  | 0.10419071                                             | 5939.134888                    | 6617.724565                     | 7296.313041                    | 618.8026805                           | 689.5054207                            | 760.2080357                           |
| M18.01  | Tepic     | 90  | 0.052095355                                            | 5939.134888                    | 6617.724565                     | 7296.313041                    | 309.4013402                           | 344.7527103                            | 380.1040179                           |
| M18.01  | Tepic     | 91  | 0.191016302                                            | 5939.134888                    | 6617.724565                     | 7296.313041                    | 1134.471581                           | 1264.093271                            | 1393.714732                           |
| M18.01  | Tepic     | 92  | 0.086825592                                            | 5939.134888                    | 6617.724565                     | 7296.313041                    | 515.6689004                           | 574.5878506                            | 633.5066965                           |

| City ID | City name | Age | Avoidable deaths from respiratory causes mean estimate | Lower value, lost productivity | Center value, lost productivity | Upper value, lost productivity | Lost productivity by age, lower value | Lost productivity by age, center value | Lost productivity by age, upper value |
|---------|-----------|-----|--------------------------------------------------------|--------------------------------|---------------------------------|--------------------------------|---------------------------------------|----------------------------------------|---------------------------------------|
| M18.01  | Tepic     | 93  | 0.086825592                                            | 5939.134888                    | 6617.724565                     | 7296.313041                    | 515.6689004                           | 574.5878506                            | 633.5066965                           |
| M18.01  | Tepic     | 94  | 0.034730237                                            | 5939.134888                    | 6617.724565                     | 7296.313041                    | 206.2675602                           | 229.8351402                            | 253.4026786                           |
| M18.01  | Tepic     | 95  | 0.069460473                                            | 5939.134888                    | 6617.724565                     | 7296.313041                    | 412.5351203                           | 459.6702804                            | 506.8053572                           |
| M18.01  | Tepic     | 96  | 0.086825592                                            | 5939.134888                    | 6617.724565                     | 7296.313041                    | 515.6689004                           | 574.5878506                            | 633.5066965                           |
| M18.01  | Tepic     | 97  | 0.034730237                                            | 5939.134888                    | 6617.724565                     | 7296.313041                    | 206.2675602                           | 229.8351402                            | 253.4026786                           |
| M18.01  | Tepic     | 98  | 0.052095355                                            | 5939.134888                    | 6617.724565                     | 7296.313041                    | 309.4013402                           | 344.7527103                            | 380.1040179                           |
| M18.01  | Tepic     | 99  | 0.017365118                                            | 5939.134888                    | 6617.724565                     | 7296.313041                    | 103.1337801                           | 114.9175701                            | 126.7013393                           |
| M18.01  | Tepic     | 100 | 0.017365118                                            | 5939.134888                    | 6617.724565                     | 7296.313041                    | 103.1337801                           | 114.9175701                            | 126.7013393                           |
| M18.01  | Tepic     | 101 | 0.017365118                                            | 5939.134888                    | 6617.724565                     | 7296.313041                    | 103.1337801                           | 114.9175701                            | 126.7013393                           |
| M18.01  | Tepic     | 102 | 0.017365118                                            | 5939.134888                    | 6617.724565                     | 7296.313041                    | 103.1337801                           | 114.9175701                            | 126.7013393                           |
| M18.01  | Tepic     | 104 | 0.017365118                                            | 5939.134888                    | 6617.724565                     | 7296.313041                    | 103.1337801                           | 114.9175701                            | 126.7013393                           |
| M19.01  | Monterrey | 30  | 0.061488303                                            | 264984.9071                    | 273569.2702                     | 282153.6204                    | 16293.47215                           | 16821.31007                            | 17349.14719                           |
| M19.01  | Monterrey | 31  | 0.056040547                                            | 262984.079                     | 271607.8344                     | 280231.5766                    | 14737.77175                           | 15221.05172                            | 15704.33095                           |
| M19.01  | Monterrey | 32  | 0.104942976                                            | 260904.6486                    | 269568.2557                     | 278231.8492                    | 27380.11027                           | 28289.29499                            | 29198.47827                           |
| M19.01  | Monterrey | 33  | 0.083902241                                            | 258351.8207                    | 267042.0411                     | 275732.2474                    | 21676.29679                           | 22405.42575                            | 23134.55354                           |
| M19.01  | Monterrey | 34  | 0.110675108                                            | 255829.4464                    | 264556.3586                     | 273283.2575                    | 28313.95155                           | 29279.80349                            | 30245.65396                           |
| M19.01  | Monterrey | 35  | 0.128717901                                            | 253146.9684                    | 261898.4041                     | 270649.8262                    | 32584.5463                            | 33711.01273                            | 34837.4774                            |
| M19.01  | Monterrey | 36  | 0.055498635                                            | 250281.0247                    | 258930.9684                     | 267580.8992                    | 13890.25531                           | 14370.31538                            | 14850.37473                           |
| M19.01  | Monterrey | 37  | 0.022135022                                            | 247193.3706                    | 255859.9456                     | 264526.5073                    | 5471.630585                           | 5663.465409                            | 5855.29994                            |
| M19.01  | Monterrey | 38  | 0.022135022                                            | 244191.2813                    | 252867.6273                     | 261543.9585                    | 5405.179274                           | 5597.23038                             | 5789.281157                           |
| M19.01  | Monterrey | 39  | 0.112851463                                            | 240615.602                     | 249290.476                      | 257965.3347                    | 27153.82279                           | 28132.79502                            | 29111.76552                           |
| M19.01  | Monterrey | 40  | 0.054404348                                            | 248319.1597                    | 257396.3906                     | 266473.6045                    | 13509.6421                            | 14003.48293                            | 14497.32284                           |

| City ID | City name | Age | Avoidable deaths from respiratory causes mean estimate | Lower value, lost productivity | Center value, lost productivity | Upper value, lost productivity | Lost productivity by age, lower value | Lost productivity by age, center value | Lost productivity by age, upper value |
|---------|-----------|-----|--------------------------------------------------------|--------------------------------|---------------------------------|--------------------------------|---------------------------------------|----------------------------------------|---------------------------------------|
| M19.01  | Monterrey | 41  | 0.038543371                                            | 244541.9912                    | 253490.9252                     | 262439.8418                    | 9425.472646                           | 9770.394729                            | 10115.31614                           |
| M19.01  | Monterrey | 42  | 0.14707861                                             | 240859.2752                    | 249863.6964                     | 258868.0982                    | 35425.24745                           | 36749.6052                             | 38073.96011                           |
| M19.01  | Monterrey | 43  | 0.214211339                                            | 237075.8922                    | 246130.5807                     | 255185.2507                    | 50784.34442                           | 52723.96139                            | 54663.57436                           |
| M19.01  | Monterrey | 44  | 0.21376055                                             | 232791.7506                    | 241892.7143                     | 250993.6576                    | 49761.69265                           | 51707.11966                            | 53652.5423                            |
| M19.01  | Monterrey | 45  | 0.194352597                                            | 228437.6164                    | 237566.9362                     | 246696.235                     | 44397.4439                            | 46171.75092                            | 47946.05385                           |
| M19.01  | Monterrey | 46  | 0.16152914                                             | 223786.1812                    | 232955.8939                     | 242125.585                     | 36147.98929                           | 37629.1651                             | 39110.33741                           |
| M19.01  | Monterrey | 47  | 0.116992397                                            | 218892.778                     | 228094.6904                     | 237296.5806                    | 25608.79087                           | 26685.34466                            | 27761.89585                           |
| M19.01  | Monterrey | 48  | 0.203852282                                            | 214115.6684                    | 223327.584                      | 232539.4754                    | 43647.96755                           | 45525.83757                            | 47403.70265                           |
| M19.01  | Monterrey | 49  | 0.136396933                                            | 208604.7119                    | 217706.1707                     | 226807.6022                    | 28453.04296                           | 29694.45403                            | 30935.86136                           |
| M19.01  | Monterrey | 50  | 0.275529812                                            | 203205.9144                    | 212320.7746                     | 221435.6054                    | 55989.28731                           | 58500.70303                            | 61012.11063                           |
| M19.01  | Monterrey | 51  | 0.197023458                                            | 197480.3685                    | 206319.2217                     | 215158.0507                    | 38908.26511                           | 40649.72653                            | 42391.18319                           |
| M19.01  | Monterrey | 52  | 0.16126244                                             | 192075.4023                    | 200889.8926                     | 209704.3581                    | 30974.54812                           | 32395.99435                            | 33817.43657                           |
| M19.01  | Monterrey | 53  | 0.263244719                                            | 185909.9032                    | 194679.321                      | 203448.7168                    | 48939.8002                            | 51248.30312                            | 53556.80027                           |
| M19.01  | Monterrey | 54  | 0.158028285                                            | 179215.3544                    | 187637.6676                     | 196059.9692                    | 28321.09516                           | 29652.05886                            | 30983.02075                           |
| M19.01  | Monterrey | 55  | 0.410013926                                            | 172435.3946                    | 180801.7815                     | 189168.1577                    | 70700.91316                           | 74131.24826                            | 77561.57902                           |
| M19.01  | Monterrey | 56  | 0.298201286                                            | 165344.1369                    | 173545.9158                     | 181747.6888                    | 49305.83421                           | 51751.61523                            | 54197.39448                           |
| M19.01  | Monterrey | 57  | 0.188624169                                            | 158387.5396                    | 166472.7814                     | 174558.0232                    | 29875.71802                           | 31400.79003                            | 32925.86206                           |
| M19.01  | Monterrey | 58  | 0.464784777                                            | 150533.8041                    | 157853.3711                     | 165172.9382                    | 69965.82049                           | 73367.84382                            | 76769.86717                           |
| M19.01  | Monterrey | 59  | 0.358605764                                            | 143323.6936                    | 150380.5496                     | 157437.4095                    | 51396.70265                           | 53927.33192                            | 56457.96255                           |
| M19.01  | Monterrey | 60  | 0.258075881                                            | 136365.6718                    | 143188.0566                     | 150010.4453                    | 35192.69085                           | 36953.38382                            | 38714.0778                            |
| M19.01  | Monterrey | 61  | 0.325296315                                            | 128840.4808                    | 135470.7378                     | 142100.9927                    | 41911.33365                           | 44068.13183                            | 46224.92931                           |
| M19.01  | Monterrey | 62  | 0.589834582                                            | 121032.942                     | 127473.154                      | 133913.3662                    | 71389.41469                           | 75188.07444                            | 78986.73432                           |

| City ID | City name | Age | Avoidable deaths from respiratory causes mean estimate | Lower value, lost productivity | Center value, lost productivity | Upper value, lost productivity | Lost productivity by age, lower value | Lost productivity by age, center value | Lost productivity by age, upper value |
|---------|-----------|-----|--------------------------------------------------------|--------------------------------|---------------------------------|--------------------------------|---------------------------------------|----------------------------------------|---------------------------------------|
| M19.01  | Monterrey | 63  | 0.47865739                                             | 113724.5373                    | 119961.2342                     | 126197.9302                    | 54435.09019                           | 57420.33126                            | 60405.57186                           |
| M19.01  | Monterrey | 64  | 0.397977086                                            | 106255.6606                    | 112286.4575                     | 118317.2546                    | 42287.31815                           | 44687.43712                            | 47087.55617                           |
| M19.01  | Monterrey | 65  | 0.409516836                                            | 98876.48955                    | 104605.7504                     | 110335.0114                    | 40491.5872                            | 42837.81595                            | 45184.0448                            |
| M19.01  | Monterrey | 66  | 0.302067007                                            | 91036.47528                    | 96450.45266                     | 101864.429                     | 27499.1156                            | 29134.49954                            | 30769.88317                           |
| M19.01  | Monterrey | 67  | 0.53492381                                             | 82875.99698                    | 87985.34363                     | 93094.68925                    | 44332.34406                           | 47065.45524                            | 49798.56586                           |
| M19.01  | Monterrey | 68  | 0.528788733                                            | 74954.00784                    | 79625.54718                     | 84297.08545                    | 39634.83486                           | 42105.09222                            | 44575.34903                           |
| M19.01  | Monterrey | 69  | 0.644272                                               | 67038.25876                    | 71179.86379                     | 75321.46772                    | 43190.87303                           | 45859.19318                            | 48527.51263                           |
| M19.01  | Monterrey | 70  | 0.687955478                                            | 59120.71311                    | 62886.25236                     | 66651.79047                    | 40672.41845                           | 43262.94181                            | 45853.46438                           |
| M19.01  | Monterrey | 71  | 0.640131159                                            | 51361.54866                    | 54689.02429                     | 58016.49875                    | 32878.12767                           | 35008.1485                             | 37138.16858                           |
| M19.01  | Monterrey | 72  | 0.6879166                                              | 43195.5088                     | 46150.86938                     | 49106.22876                    | 29714.90757                           | 31747.94917                            | 33780.98994                           |
| M19.01  | Monterrey | 73  | 0.722124949                                            | 34718.40028                    | 37278.76072                     | 39839.12115                    | 25071.02305                           | 26919.9232                             | 28768.82335                           |
| M19.01  | Monterrey | 74  | 0.538734323                                            | 26371.27699                    | 28411.02289                     | 30450.7688                     | 14207.11204                           | 15305.99317                            | 16404.8743                            |
| M19.01  | Monterrey | 75  | 0.949728341                                            | 17201.3844                     | 18613.94174                     | 20026.49908                    | 16336.64226                           | 17678.188                              | 19019.73374                           |
| M19.01  | Monterrey | 76  | 0.869535436                                            | 8262.323036                    | 9031.581147                     | 9800.839258                    | 7184.38266                            | 7853.279847                            | 8522.177034                           |
| M19.01  | Monterrey | 77  | 0.763236097                                            | 8262.323036                    | 9031.581147                     | 9800.839258                    | 6306.103187                           | 6893.228745                            | 7480.354304                           |
| M19.01  | Monterrey | 78  | 1.078297821                                            | 8262.323036                    | 9031.581147                     | 9800.839258                    | 8909.244923                           | 9738.734268                            | 10568.22361                           |
| M19.01  | Monterrey | 79  | 1.100477001                                            | 8262.323036                    | 9031.581147                     | 9800.839258                    | 9092.496473                           | 9939.047332                            | 10785.59819                           |
| M19.01  | Monterrey | 80  | 1.079029195                                            | 8262.323036                    | 9031.581147                     | 9800.839258                    | 8915.287773                           | 9745.339733                            | 10575.39169                           |
| M19.01  | Monterrey | 81  | 1.085393071                                            | 8262.323036                    | 9031.581147                     | 9800.839258                    | 8967.868175                           | 9802.815599                            | 10637.76302                           |
| M19.01  | Monterrey | 82  | 1.120659041                                            | 8262.323036                    | 9031.581147                     | 9800.839258                    | 9259.24701                            | 10121.32307                            | 10983.39912                           |
| M19.01  | Monterrey | 83  | 1.075257467                                            | 8262.323036                    | 9031.581147                     | 9800.839258                    | 8884.124537                           | 9711.275065                            | 10538.42559                           |
| M19.01  | Monterrey | 84  | 1.327321921                                            | 8262.323036                    | 9031.581147                     | 9800.839258                    | 10966.76249                           | 11987.81564                            | 13008.86879                           |

| City ID | City name | Age | Avoidable deaths from respiratory causes mean estimate | Lower value, lost productivity | Center value, lost productivity | Upper value, lost productivity | Lost productivity by age, lower value | Lost productivity by age, center value | Lost productivity by age, upper value |
|---------|-----------|-----|--------------------------------------------------------|--------------------------------|---------------------------------|--------------------------------|---------------------------------------|----------------------------------------|---------------------------------------|
| M19.01  | Monterrey | 85  | 0.873845744                                            | 8262.323036                    | 9031.581147                     | 9800.839258                    | 7219.995818                           | 7892.208745                            | 8564.421671                           |
| M19.01  | Monterrey | 86  | 1.113883826                                            | 8262.323036                    | 9031.581147                     | 9800.839258                    | 9203.267995                           | 10060.13216                            | 10916.99633                           |
| M19.01  | Monterrey | 87  | 0.863499103                                            | 8262.323036                    | 9031.581147                     | 9800.839258                    | 7134.508528                           | 7798.762216                            | 8463.015905                           |
| M19.01  | Monterrey | 88  | 0.753051331                                            | 8262.323036                    | 9031.581147                     | 9800.839258                    | 6221.95336                            | 6801.244204                            | 7380.535049                           |
| M19.01  | Monterrey | 89  | 0.686873696                                            | 8262.323036                    | 9031.581147                     | 9800.839258                    | 5675.17236                            | 6203.555522                            | 6731.938683                           |
| M19.01  | Monterrey | 90  | 0.694507427                                            | 8262.323036                    | 9031.581147                     | 9800.839258                    | 5738.244709                           | 6272.50018                             | 6806.755651                           |
| M19.01  | Monterrey | 91  | 0.887272907                                            | 8262.323036                    | 9031.581147                     | 9800.839258                    | 7330.935378                           | 8013.477258                            | 8696.019139                           |
| M19.01  | Monterrey | 92  | 0.790959339                                            | 8262.323036                    | 9031.581147                     | 9800.839258                    | 6535.161565                           | 7143.613452                            | 7752.065339                           |
| M19.01  | Monterrey | 93  | 0.513917236                                            | 8262.323036                    | 9031.581147                     | 9800.839258                    | 4246.15022                            | 4641.485223                            | 5036.820225                           |
| M19.01  | Monterrey | 94  | 0.631606013                                            | 8262.323036                    | 9031.581147                     | 9800.839258                    | 5218.53291                            | 5704.400959                            | 6190.269007                           |
| M19.01  | Monterrey | 95  | 0.40316064                                             | 8262.323036                    | 9031.581147                     | 9800.839258                    | 3331.043445                           | 3641.178037                            | 3951.31263                            |
| M19.01  | Monterrey | 96  | 0.404029253                                            | 8262.323036                    | 9031.581147                     | 9800.839258                    | 3338.220204                           | 3649.022984                            | 3959.825764                           |
| M19.01  | Monterrey | 97  | 0.127083457                                            | 8262.323036                    | 9031.581147                     | 9800.839258                    | 1050.004574                           | 1147.764554                            | 1245.524534                           |
| M19.01  | Monterrey | 98  | 0.168087937                                            | 8262.323036                    | 9031.581147                     | 9800.839258                    | 1388.796838                           | 1518.099847                            | 1647.402856                           |
| M19.01  | Monterrey | 99  | 0.1219037                                              | 8262.323036                    | 9031.581147                     | 9800.839258                    | 1007.207748                           | 1100.983158                            | 1194.758568                           |
| M19.01  | Monterrey | 100 | 0.175769554                                            | 8262.323036                    | 9031.581147                     | 9800.839258                    | 1452.264834                           | 1587.476989                            | 1722.689144                           |
| M19.01  | Monterrey | 101 | 0.138312049                                            | 8262.323036                    | 9031.581147                     | 9800.839258                    | 1142.77883                            | 1249.176496                            | 1355.574162                           |
| M19.01  | Monterrey | 102 | 0.104948435                                            | 8262.323036                    | 9031.581147                     | 9800.839258                    | 867.1178759                           | 947.8503111                            | 1028.582746                           |
| M19.01  | Monterrey | 104 | 0.059319069                                            | 8262.323036                    | 9031.581147                     | 9800.839258                    | 490.1133073                           | 535.744982                             | 581.3766566                           |
| M19.01  | Monterrey | 105 | 0.016408349                                            | 8262.323036                    | 9031.581147                     | 9800.839258                    | 135.5710821                           | 148.1933379                            | 160.8155936                           |
| M19.01  | Monterrey | 108 | 0.022135022                                            | 8262.323036                    | 9031.581147                     | 9800.839258                    | 182.8866984                           | 199.9142433                            | 216.9417882                           |
| M30.08  | Xalapa    | 32  | 0.012297348                                            | 161083.4463                    | 201346.6318                     | 242577.8204                    | 1980.899125                           | 2476.029511                            | 2983.063767                           |

| City ID | City name | Age | Avoidable deaths from respiratory causes mean estimate | Lower value, lost productivity | Center value, lost productivity | Upper value, lost productivity | Lost productivity by age, lower value | Lost productivity by age, center value | Lost productivity by age, upper value |
|---------|-----------|-----|--------------------------------------------------------|--------------------------------|---------------------------------|--------------------------------|---------------------------------------|----------------------------------------|---------------------------------------|
| M30.08  | Xalapa    | 34  | 0.012297348                                            | 154347.228                     | 195374.5401                     | 237428.804                     | 1898.061508                           | 2402.588623                            | 2919.744524                           |
| M30.08  | Xalapa    | 36  | 0.012297348                                            | 152476.4821                    | 193888.3512                     | 236389.7137                    | 1875.056295                           | 2384.312443                            | 2906.966469                           |
| M30.08  | Xalapa    | 38  | 0.012297348                                            | 146486.4001                    | 186229.1416                     | 227127.7255                    | 1801.394174                           | 2290.124481                            | 2793.068581                           |
| M30.08  | Xalapa    | 39  | 0.012297348                                            | 145501.9402                    | 184531.6472                     | 224751.8729                    | 1789.28793                            | 2269.249801                            | 2763.851896                           |
| M30.08  | Xalapa    | 42  | 0.024594695                                            | 144087.8193                    | 183811.5075                     | 224836.1078                    | 3543.795985                           | 4520.787987                            | 5529.775523                           |
| M30.08  | Xalapa    | 49  | 0.012297348                                            | 122693.5564                    | 160715.3789                     | 200337.1565                    | 1508.805306                           | 1976.372873                            | 2463.615643                           |
| M30.08  | Xalapa    | 50  | 0.012297348                                            | 118931.8529                    | 156288.1382                     | 195292.3774                    | 1462.546331                           | 1921.929555                            | 2401.57824                            |
| M30.08  | Xalapa    | 52  | 0.024594695                                            | 111096.7082                    | 148578.135                      | 187807.8785                    | 2732.389667                           | 3654.233933                            | 4619.077513                           |
| M30.08  | Xalapa    | 58  | 0.024594695                                            | 80228.29494                    | 114648.8739                     | 151157.0261                    | 1973.190454                           | 2819.7541                              | 3717.660971                           |
| M30.08  | Xalapa    | 59  | 0.024594695                                            | 77026.42827                    | 109271.7941                     | 143667.3603                    | 1894.44152                            | 2687.506461                            | 3533.454924                           |
| M30.08  | Xalapa    | 60  | 0.024594695                                            | 74358.82377                    | 104875.7482                     | 137607.3777                    | 1828.8326                             | 2579.387052                            | 3384.411502                           |
| M30.08  | Xalapa    | 62  | 0.036892043                                            | 64601.58099                    | 93360.88738                     | 124469.7745                    | 2383.284283                           | 3444.273842                            | 4591.944232                           |
| M30.08  | Xalapa    | 63  | 0.012297348                                            | 59146.50819                    | 86827.85596                     | 116929.2718                    | 727.3451682                           | 1067.752323                            | 1437.919896                           |
| M30.08  | Xalapa    | 65  | 0.012297348                                            | 48651.79467                    | 73629.43429                     | 101174.5241                    | 598.2880285                           | 905.4467441                            | 1244.178287                           |
| M30.08  | Xalapa    | 66  | 0.024594695                                            | 44946.46857                    | 68394.88939                     | 94487.78518                    | 1105.444691                           | 1682.151452                            | 2323.898269                           |
| M30.08  | Xalapa    | 67  | 0.04918939                                             | 35420.25472                    | 57929.16611                     | 83161.88919                    | 1742.300732                           | 2849.500358                            | 4090.682621                           |
| M30.08  | Xalapa    | 68  | 0.073784085                                            | 30216.18256                    | 50043.79068                     | 72676.92733                    | 2229.473393                           | 3692.435324                            | 5362.40061                            |
| M30.08  | Xalapa    | 70  | 0.04918939                                             | 24881.13695                    | 37621.80469                     | 53338.86134                    | 1223.887955                           | 1850.593632                            | 2623.706066                           |
| M30.08  | Xalapa    | 71  | 0.09837878                                             | 23036.92705                    | 33091.89572                     | 46212.54373                    | 2266.344789                           | 3255.540345                            | 4546.333695                           |
| M30.08  | Xalapa    | 72  | 0.036892043                                            | 21137.39085                    | 28426.08947                     | 38872.43658                    | 779.8015255                           | 1048.696506                            | 1434.083589                           |
| M30.08  | Xalapa    | 73  | 0.04918939                                             | 17808.25137                    | 22963.50369                     | 31371.13394                    | 875.9770262                           | 1129.560744                            | 1543.12695                            |
| M30.08  | Xalapa    | 74  | 0.09837878                                             | 12528.43386                    | 15897.97946                     | 22617.47434                    | 1232.532044                           | 1564.023831                            | 2225.079543                           |

| City ID | City name | Age | Avoidable deaths from respiratory causes mean estimate | Lower value, lost productivity | Center value, lost productivity | Upper value, lost productivity | Lost productivity by age, lower value | Lost productivity by age, center value | Lost productivity by age, upper value |
|---------|-----------|-----|--------------------------------------------------------|--------------------------------|---------------------------------|--------------------------------|---------------------------------------|----------------------------------------|---------------------------------------|
| M30.08  | Xalapa    | 75  | 0.036892043                                            | 7090.221814                    | 10345.71456                     | 13601.20495                    | 261.5727658                           | 381.6745432                            | 501.7762334                           |
| M30.08  | Xalapa    | 76  | 0.061486738                                            | 2412.661759                    | 4440.788727                     | 6468.914495                    | 148.346701                            | 273.0496121                            | 397.7524494                           |
| M30.08  | Xalapa    | 77  | 0.073784085                                            | 2412.661759                    | 4440.788727                     | 6468.914495                    | 178.0160412                           | 327.6595345                            | 477.3029393                           |
| M30.08  | Xalapa    | 78  | 0.073784085                                            | 2412.661759                    | 4440.788727                     | 6468.914495                    | 178.0160412                           | 327.6595345                            | 477.3029393                           |
| M30.08  | Xalapa    | 79  | 0.086081433                                            | 2412.661759                    | 4440.788727                     | 6468.914495                    | 207.6853814                           | 382.2694569                            | 556.8534291                           |
| M30.08  | Xalapa    | 80  | 0.086081433                                            | 2412.661759                    | 4440.788727                     | 6468.914495                    | 207.6853814                           | 382.2694569                            | 556.8534291                           |
| M30.08  | Xalapa    | 81  | 0.073784085                                            | 2412.661759                    | 4440.788727                     | 6468.914495                    | 178.0160412                           | 327.6595345                            | 477.3029393                           |
| M30.08  | Xalapa    | 82  | 0.086081433                                            | 2412.661759                    | 4440.788727                     | 6468.914495                    | 207.6853814                           | 382.2694569                            | 556.8534291                           |
| M30.08  | Xalapa    | 83  | 0.122973476                                            | 2412.661759                    | 4440.788727                     | 6468.914495                    | 296.6934019                           | 546.0992242                            | 795.5048988                           |
| M30.08  | Xalapa    | 84  | 0.09837878                                             | 2412.661759                    | 4440.788727                     | 6468.914495                    | 237.3547216                           | 436.8793793                            | 636.403919                            |
| M30.08  | Xalapa    | 85  | 0.135270823                                            | 2412.661759                    | 4440.788727                     | 6468.914495                    | 326.3627421                           | 600.7091466                            | 875.0553886                           |
| M30.08  | Xalapa    | 86  | 0.061486738                                            | 2412.661759                    | 4440.788727                     | 6468.914495                    | 148.346701                            | 273.0496121                            | 397.7524494                           |
| M30.08  | Xalapa    | 87  | 0.073784085                                            | 2412.661759                    | 4440.788727                     | 6468.914495                    | 178.0160412                           | 327.6595345                            | 477.3029393                           |
| M30.08  | Xalapa    | 88  | 0.09837878                                             | 2412.661759                    | 4440.788727                     | 6468.914495                    | 237.3547216                           | 436.8793793                            | 636.403919                            |
| M30.08  | Xalapa    | 89  | 0.086081433                                            | 2412.661759                    | 4440.788727                     | 6468.914495                    | 207.6853814                           | 382.2694569                            | 556.8534291                           |
| M30.08  | Xalapa    | 90  | 0.061486738                                            | 2412.661759                    | 4440.788727                     | 6468.914495                    | 148.346701                            | 273.0496121                            | 397.7524494                           |
| M30.08  | Xalapa    | 91  | 0.061486738                                            | 2412.661759                    | 4440.788727                     | 6468.914495                    | 148.346701                            | 273.0496121                            | 397.7524494                           |
| M30.08  | Xalapa    | 92  | 0.061486738                                            | 2412.661759                    | 4440.788727                     | 6468.914495                    | 148.346701                            | 273.0496121                            | 397.7524494                           |
| M30.08  | Xalapa    | 93  | 0.036892043                                            | 2412.661759                    | 4440.788727                     | 6468.914495                    | 89.00802058                           | 163.8297673                            | 238.6514696                           |
| M30.08  | Xalapa    | 94  | 0.036892043                                            | 2412.661759                    | 4440.788727                     | 6468.914495                    | 89.00802058                           | 163.8297673                            | 238.6514696                           |
| M30.08  | Xalapa    | 95  | 0.04918939                                             | 2412.661759                    | 4440.788727                     | 6468.914495                    | 118.6773608                           | 218.4396897                            | 318.2019595                           |
| M30.08  | Xalapa    | 96  | 0.04918939                                             | 2412.661759                    | 4440.788727                     | 6468.914495                    | 118.6773608                           | 218.4396897                            | 318.2019595                           |



| City ID | City name | Age | Avoidable deaths from respiratory causes mean estimate | Lower value, lost productivity | Center value, lost productivity | Upper value, lost productivity | Lost productivity by age, lower value | Lost productivity by age, center value | Lost productivity by age, upper value |
|---------|-----------|-----|--------------------------------------------------------|--------------------------------|---------------------------------|--------------------------------|---------------------------------------|----------------------------------------|---------------------------------------|
| M30.08  | Xalapa    | 97  | 0.024594695                                            | 2412.661759                    | 4440.788727                     | 6468.914495                    | 59.33868039                           | 109.2198448                            | 159.1009798                           |
| M30.08  | Xalapa    | 98  | 0.024594695                                            | 2412.661759                    | 4440.788727                     | 6468.914495                    | 59.33868039                           | 109.2198448                            | 159.1009798                           |
| M30.08  | Xalapa    | 99  | 0.012297348                                            | 2412.661759                    | 4440.788727                     | 6468.914495                    | 29.66934019                           | 54.60992242                            | 79.55048988                           |
| M30.08  | Xalapa    | 101 | 0.012297348                                            | 2412.661759                    | 4440.788727                     | 6468.914495                    | 29.66934019                           | 54.60992242                            | 79.55048988                           |
